# Supplementary material
Source: MDPI journal article supplement (https://www.mdpi.com/1424-8247/17/5/548)

## Supporting Information

# NMI-SO<sub>2</sub>Cl<sub>2</sub>-Mediated Amide Bond Formation: Facile Synthesis of Some Dihydrotriazolopyrimidine Amide Derivatives as Potential Anti-Inflammatory and Anti-Tubercular Agents

Aravinda Babu <sup>1</sup>, Kenchaiah Sunil <sup>1</sup>, Ayyiliath Meleveetil Sajith <sup>1</sup>, Eeda Koti Reddy <sup>2</sup>, Sougata Santra <sup>3</sup>, Grigory V. Zyryanov <sup>3,4</sup>, Talavara Venkatesh <sup>5</sup>, Bhadrachari Somashekara <sup>6</sup> and Nibin Joy Muthipeedika <sup>3,\*</sup>

<sup>1</sup> Department of Chemistry, SSIT, Sri Siddhartha Academy of Higher Education, Tumkur 572107, Karnataka, India

<sup>2</sup> Department of Chemistry, Vignan's Foundation for Science, Technology and Research-VFSTR (Deemed to be University), Vadlamudi, Guntur 522213, Andhra Pradesh, India

<sup>3</sup> Laboratory of Organic Synthesis, Institute of Chemical Technology, Ural Federal University, 19 Mira Street, Yekaterinburg 620002, Russia

<sup>4</sup> I. Ya. Postovskiy Institute of Organic Synthesis, Ural Division of the Russian Academy of Sciences, 22 S. Kovalevskoy Street, Yekaterinburg 620219, Russia

<sup>5</sup> Department of P.G studies and Research in Chemistry, Kuvempu University, Jnana Sahyadri, Shankaraghatta, Shimoga 577451, Karnataka, India

<sup>6</sup> Department of Chemistry, Smt. Indira Gandhi Government First Grade Women's College, Sagar 577401, Karnataka, India

\* Correspondence: mnibinjoy@gmail.com

# <sup>1</sup>H NMR of Compound of **4a**

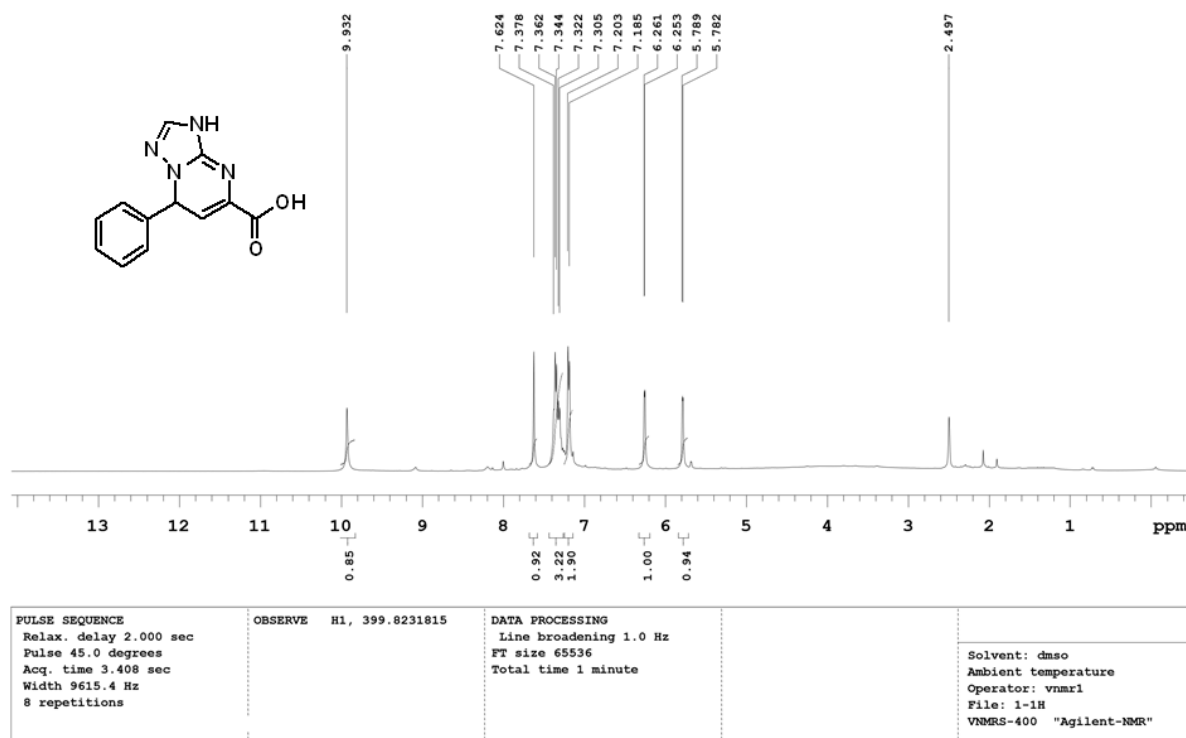

# <sup>13</sup>C NMR of Compound of **4a**

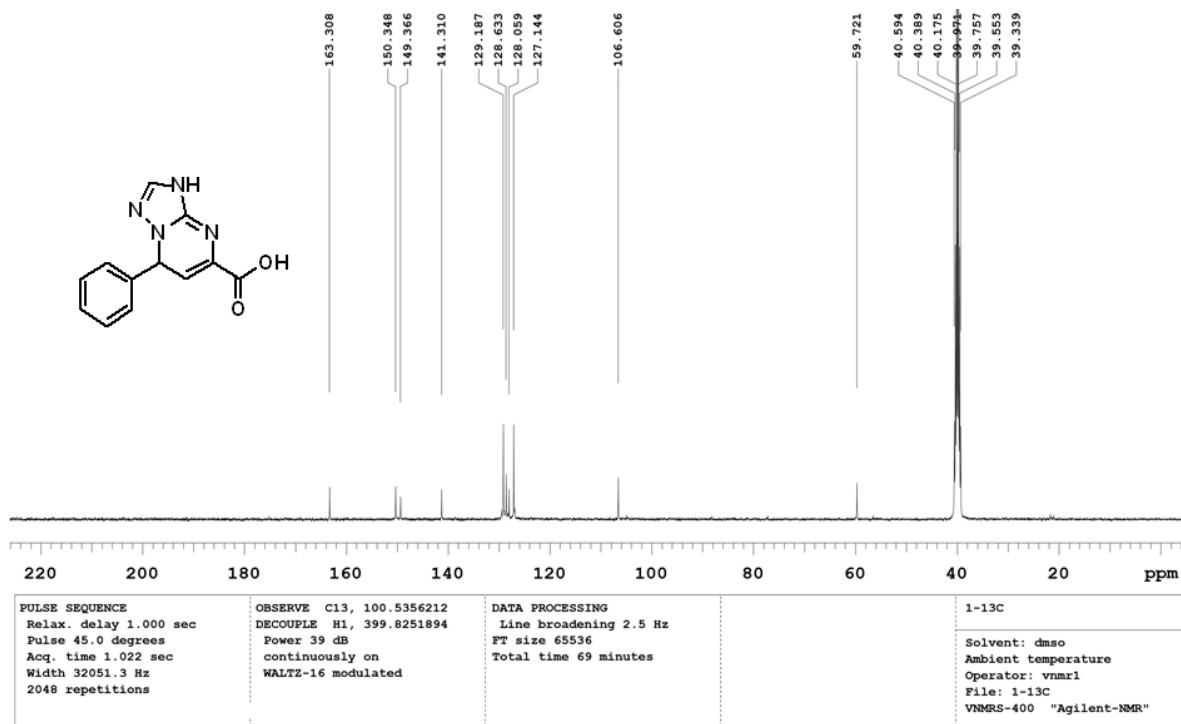

# <sup>1</sup>H NMR of Compound of **6aa**

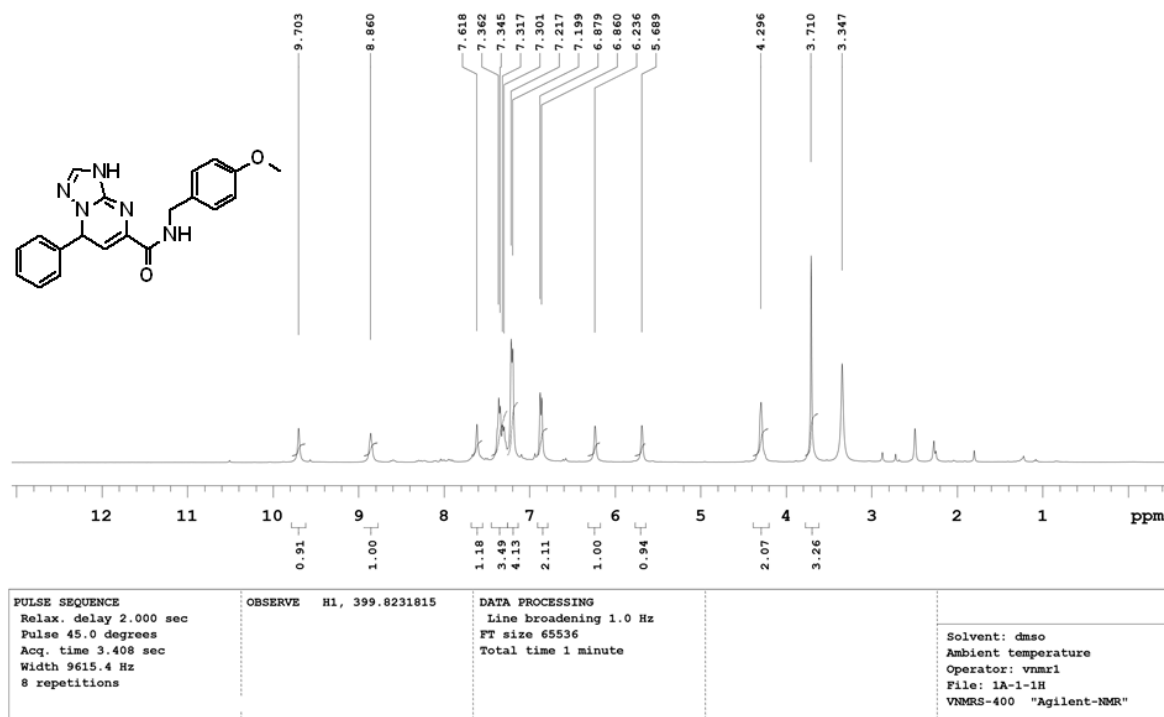

# <sup>13</sup>C NMR of Compound of **6aa**

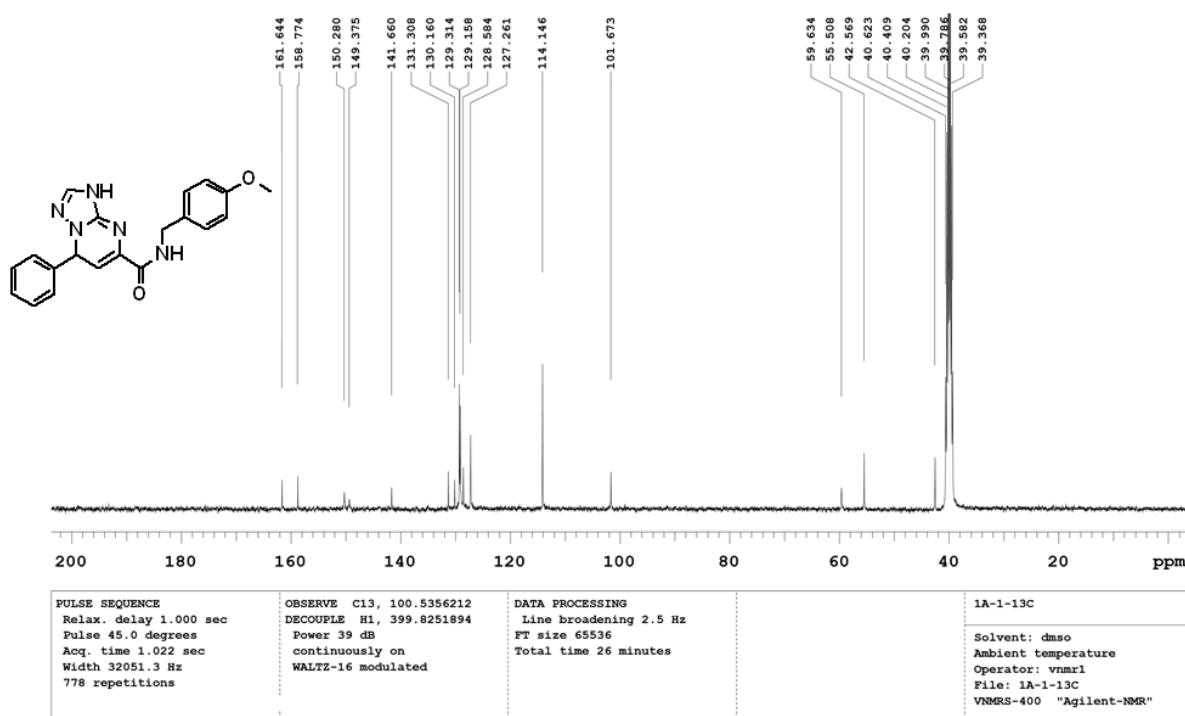

# <sup>1</sup>H NMR of Compound of **6ab**

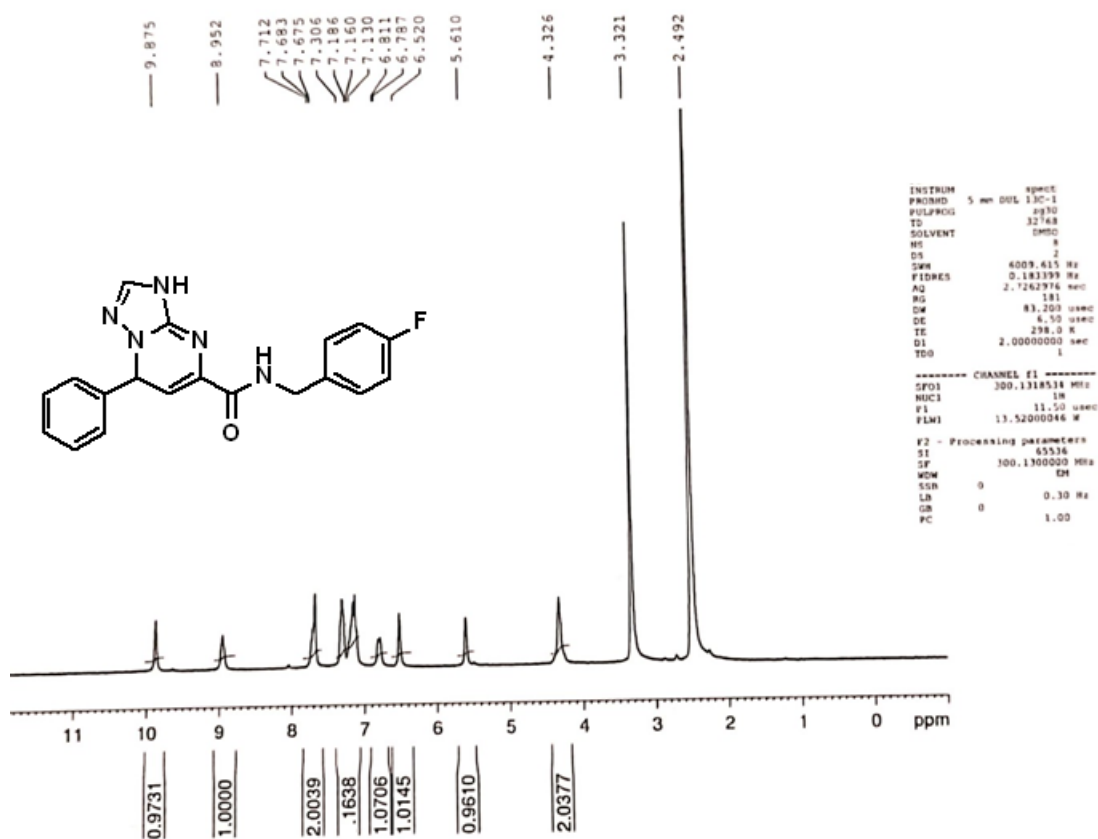

# <sup>13</sup>C NMR of Compound of **6ab**

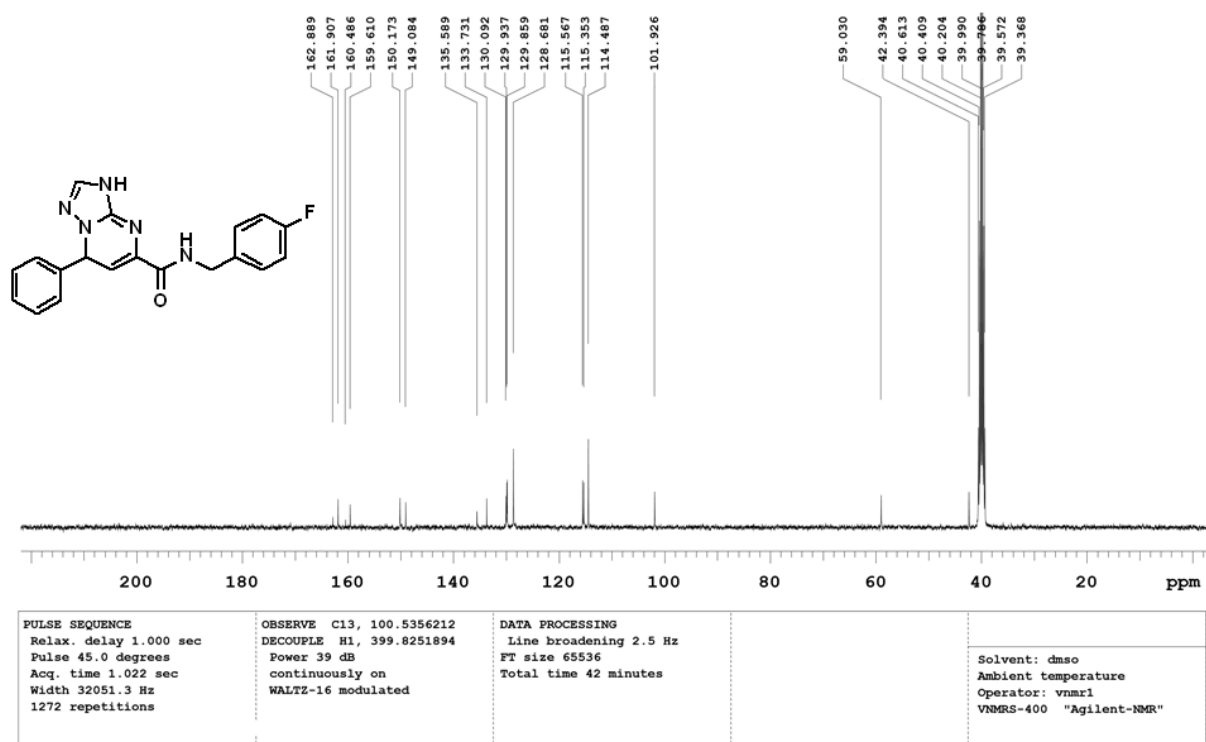

# <sup>1</sup>H NMR of Compound of **6ac**

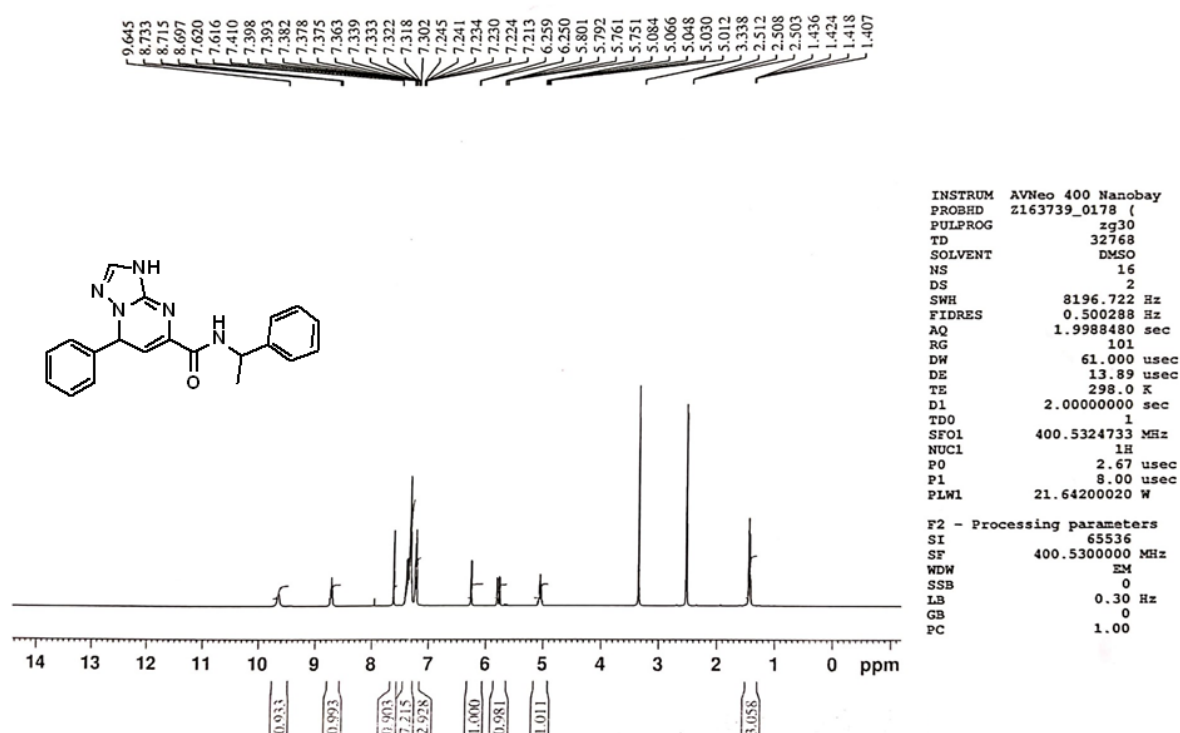

# <sup>13</sup>C NMR of Compound of **6ac**

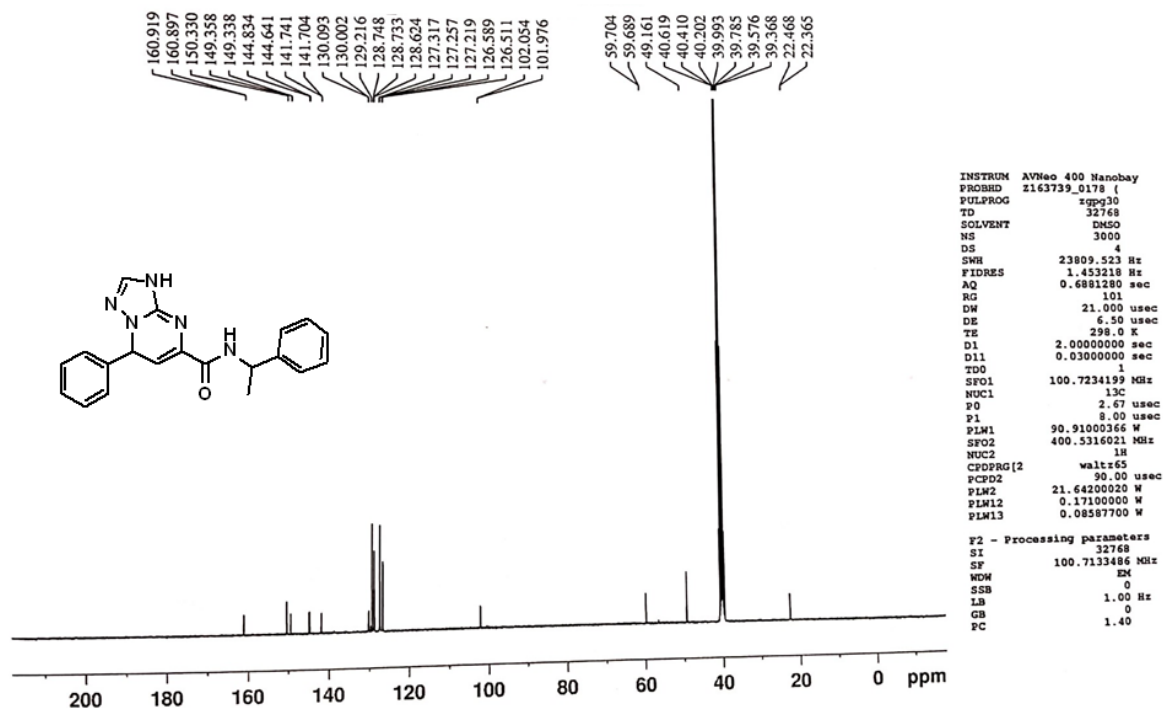

# <sup>1</sup>H NMR of Compound of **6ad**

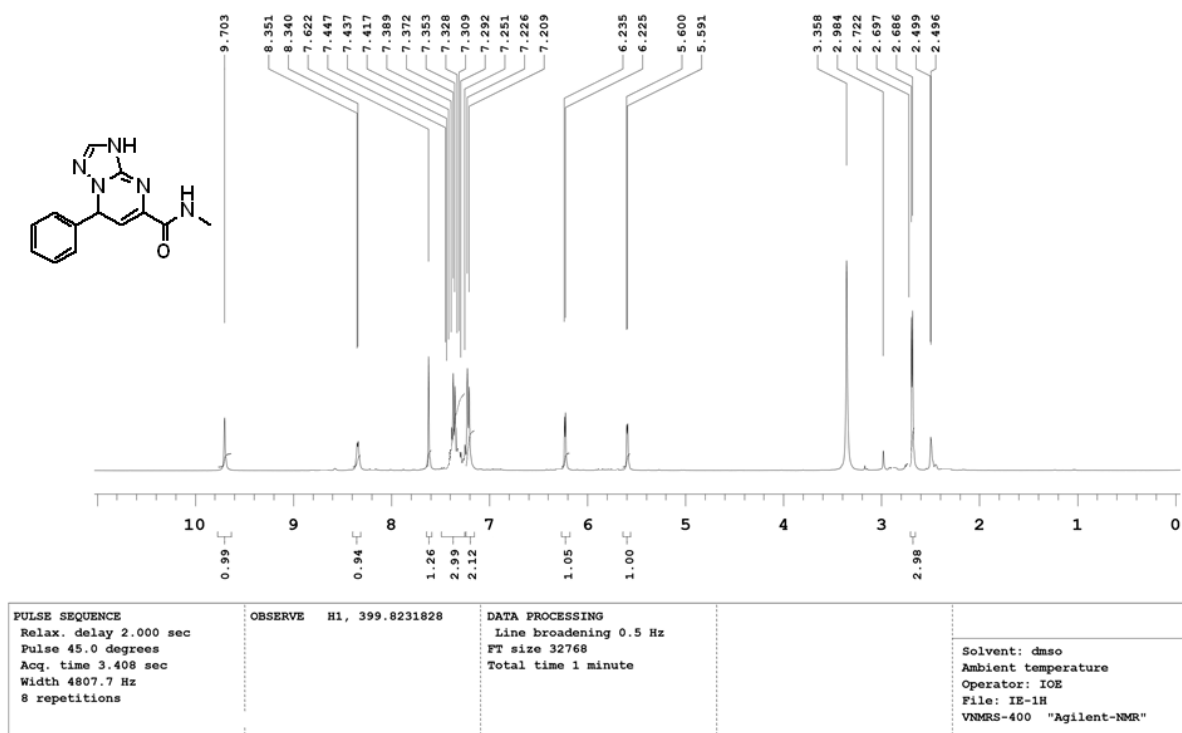

# <sup>13</sup>C NMR of Compound of **6ad**

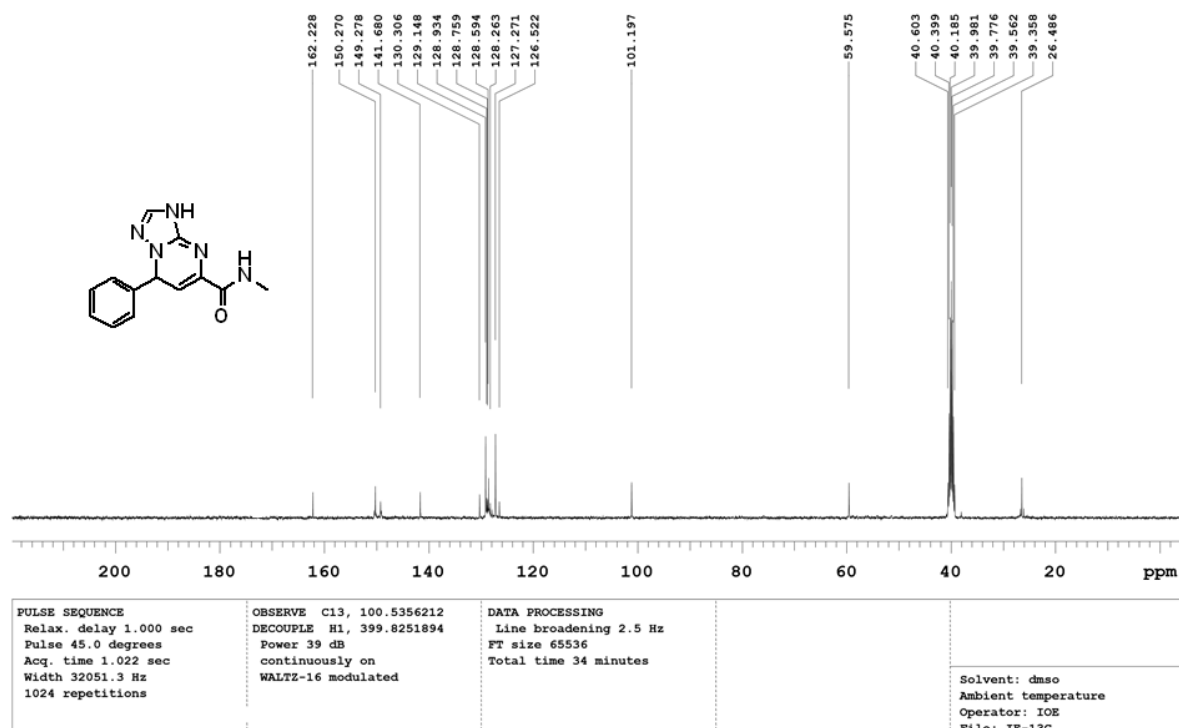

# <sup>1</sup>H NMR of Compound of **6af**

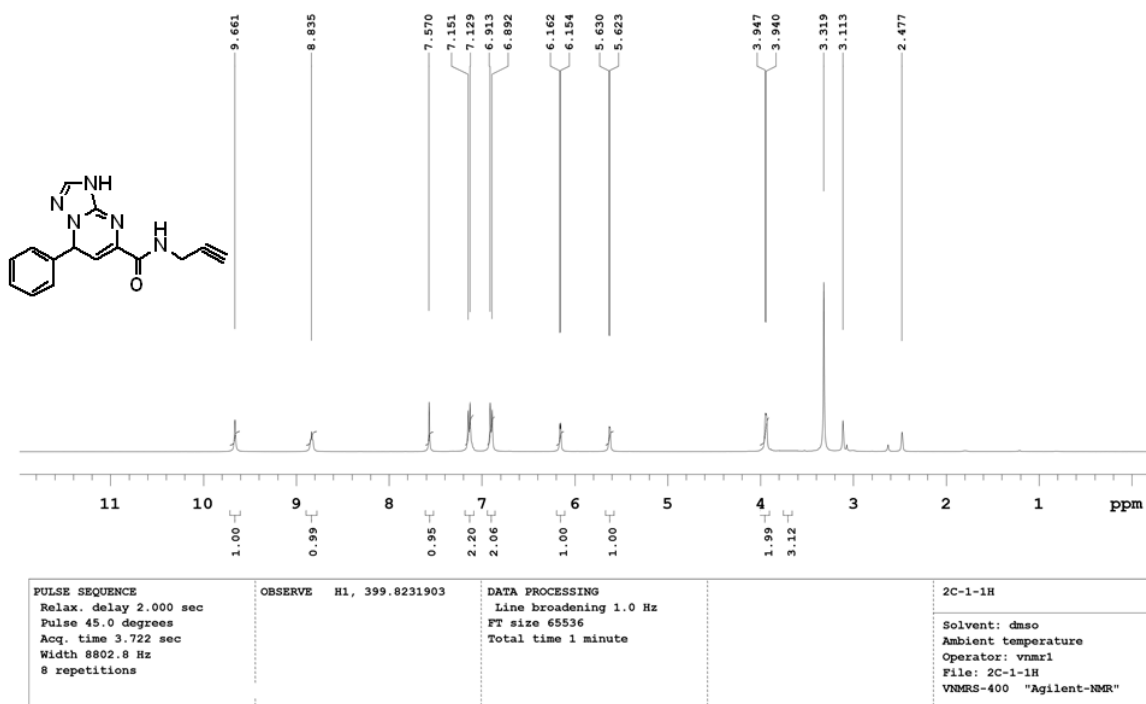

# <sup>13</sup>C NMR of Compound of **6af**

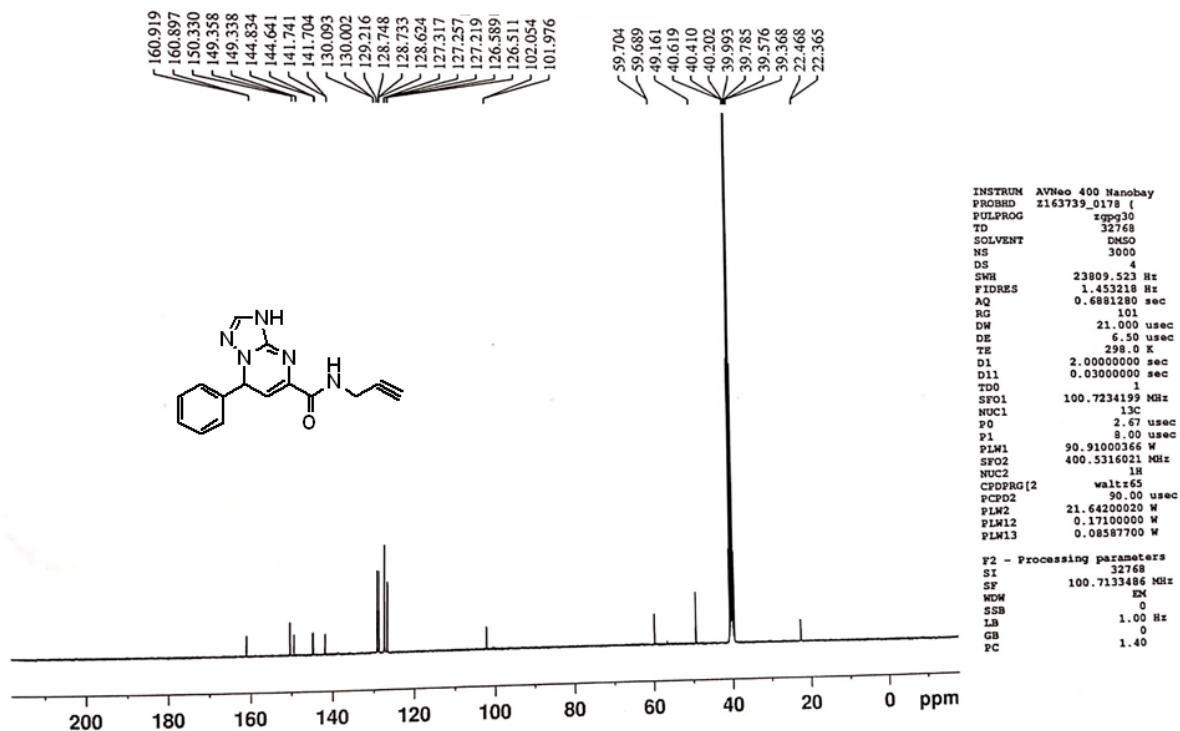

# <sup>1</sup>H NMR of Compound of **6ag**

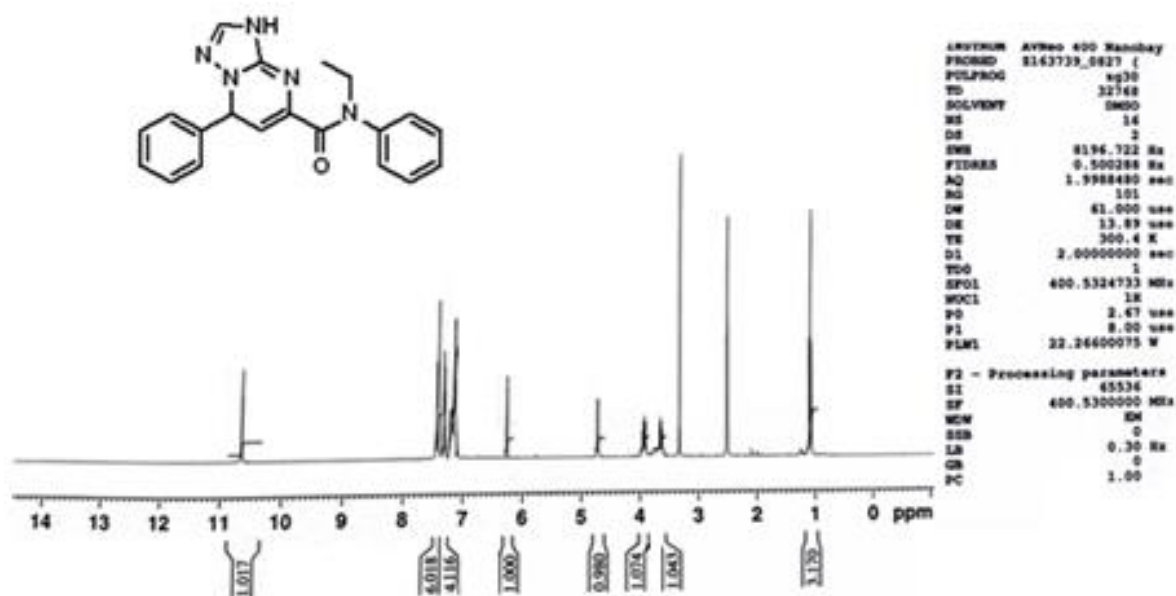

# <sup>13</sup>C NMR of Compound of **6ag**

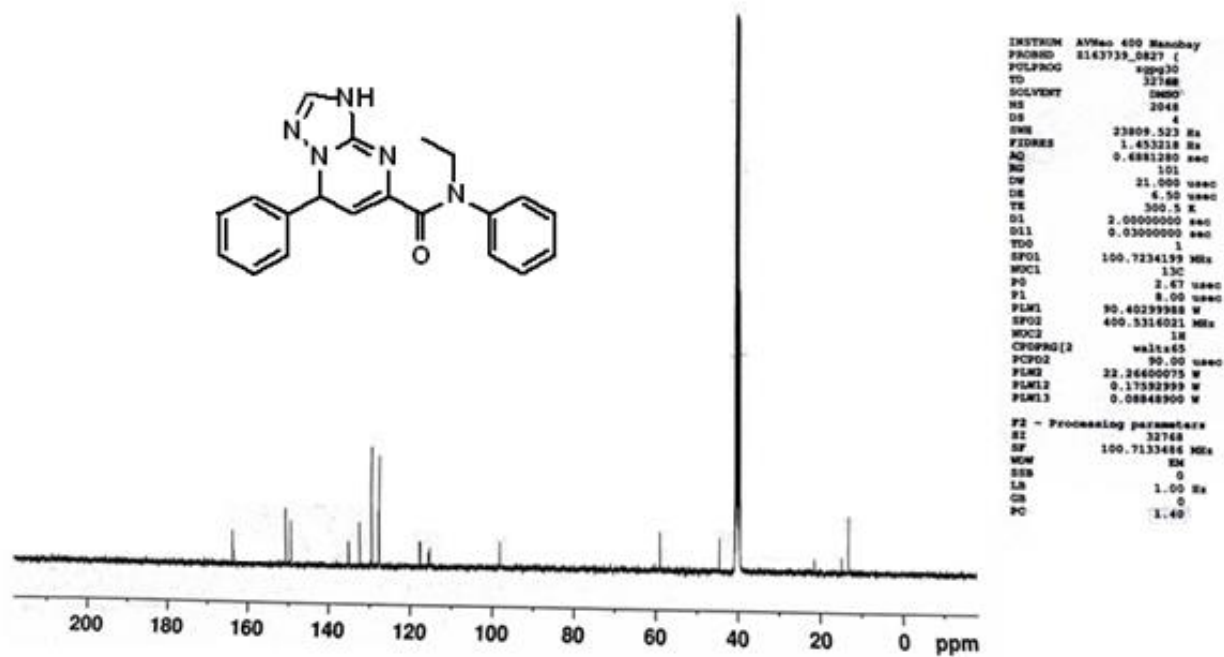



# <sup>1</sup>H NMR of Compound of **6ai**

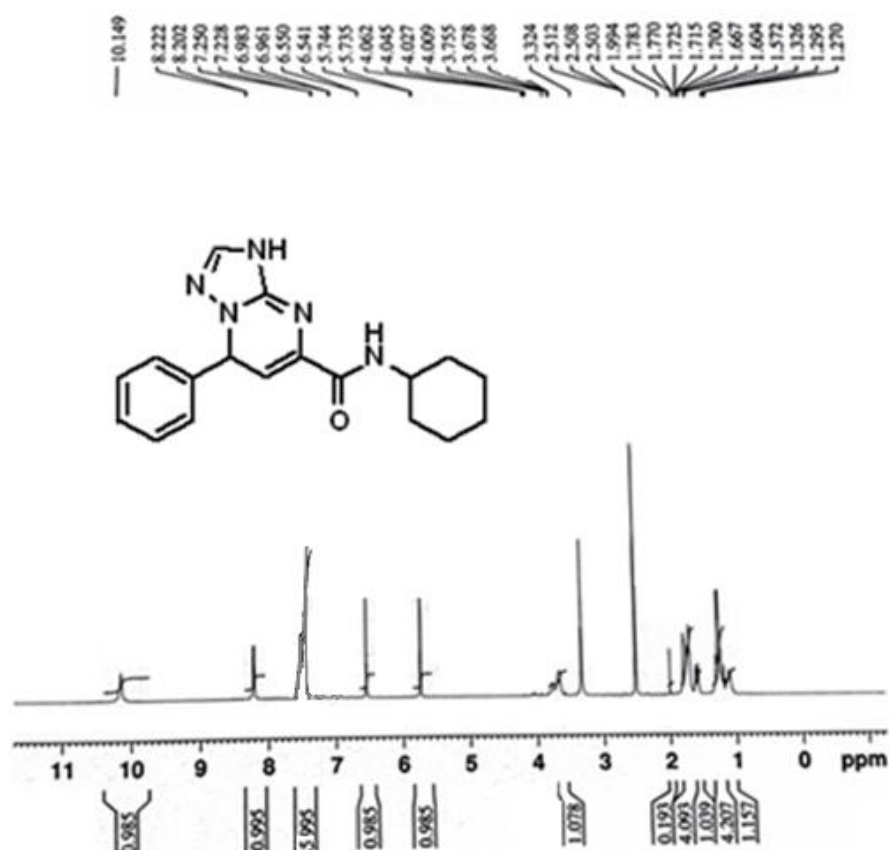

# <sup>13</sup>C NMR of Compound of **6ai**

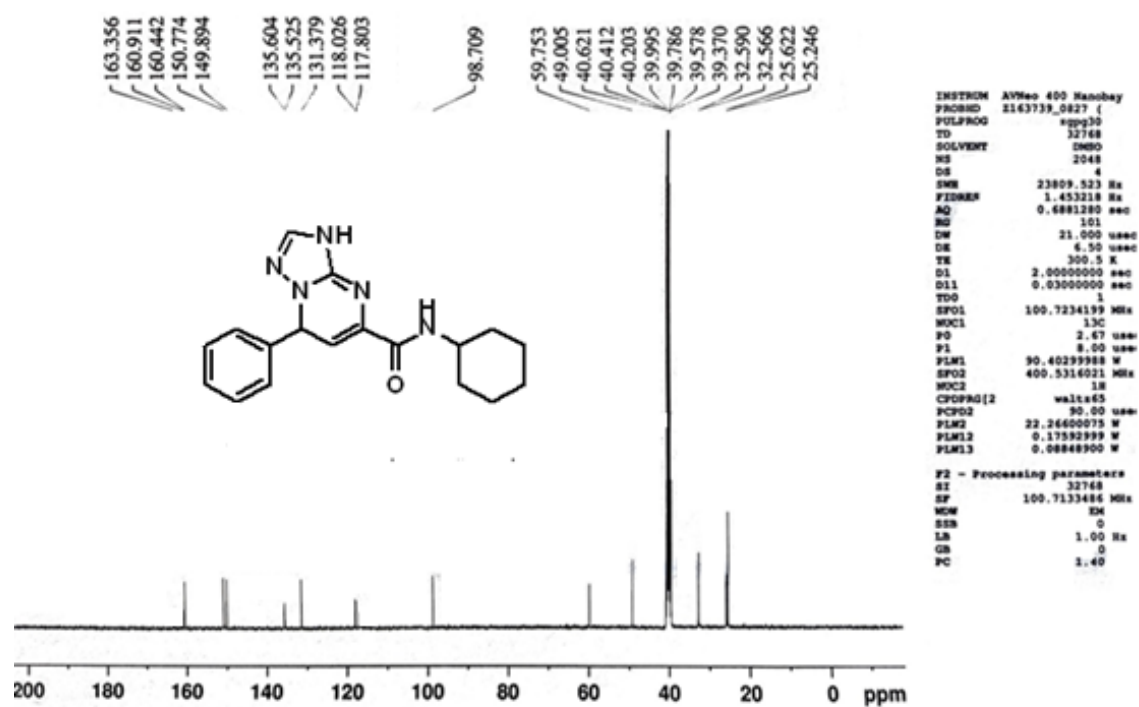

# <sup>1</sup>H NMR of Compound of **4b**

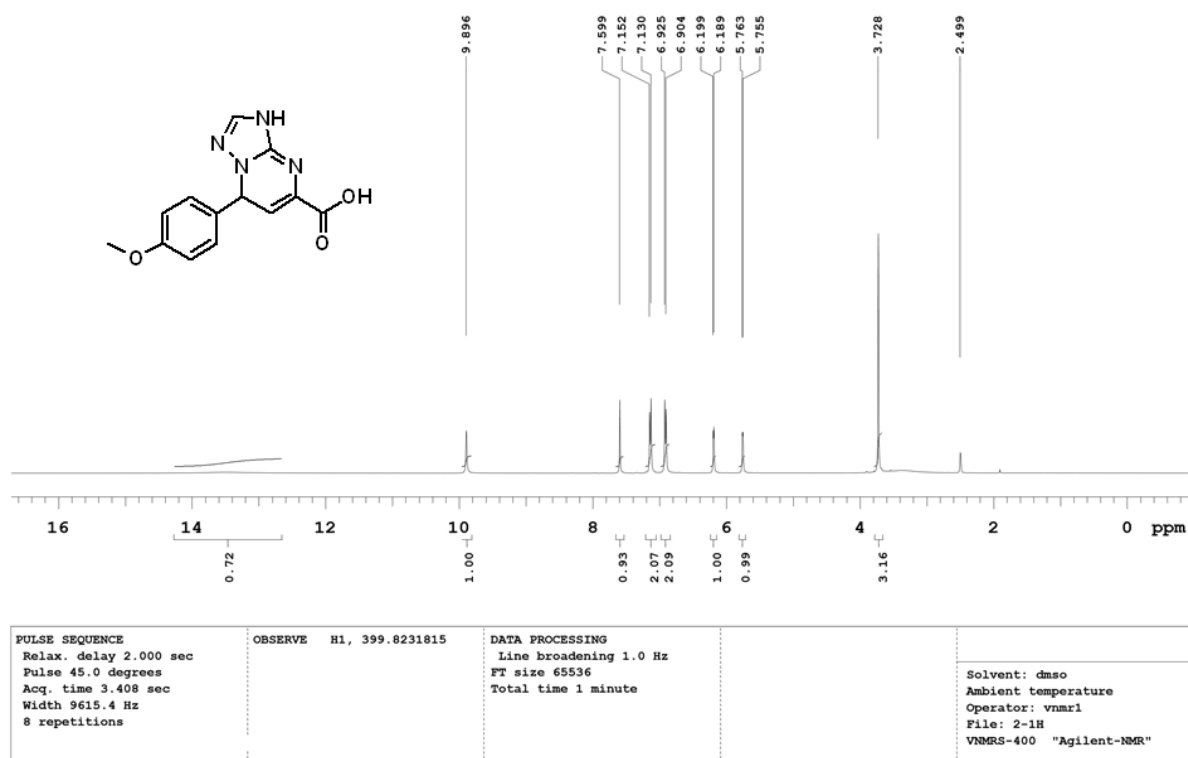

# <sup>13</sup>C NMR of Compound of **4b**

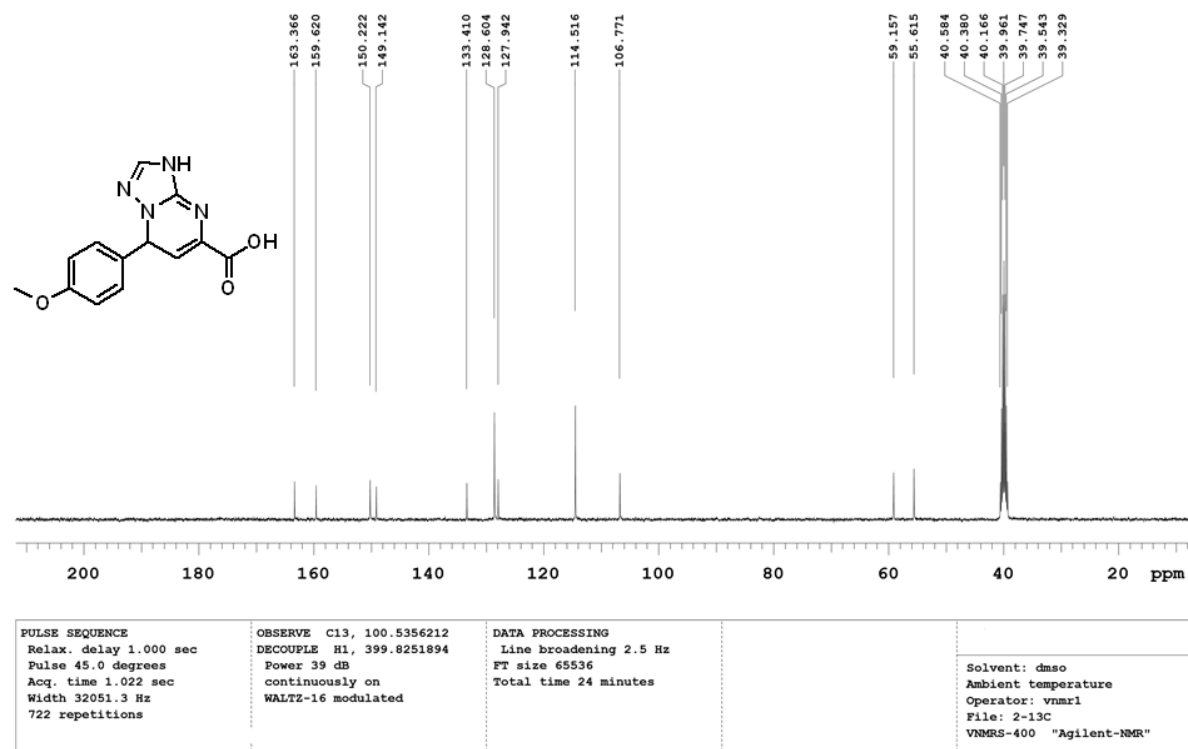

# <sup>1</sup>H NMR of Compound of **6bb**

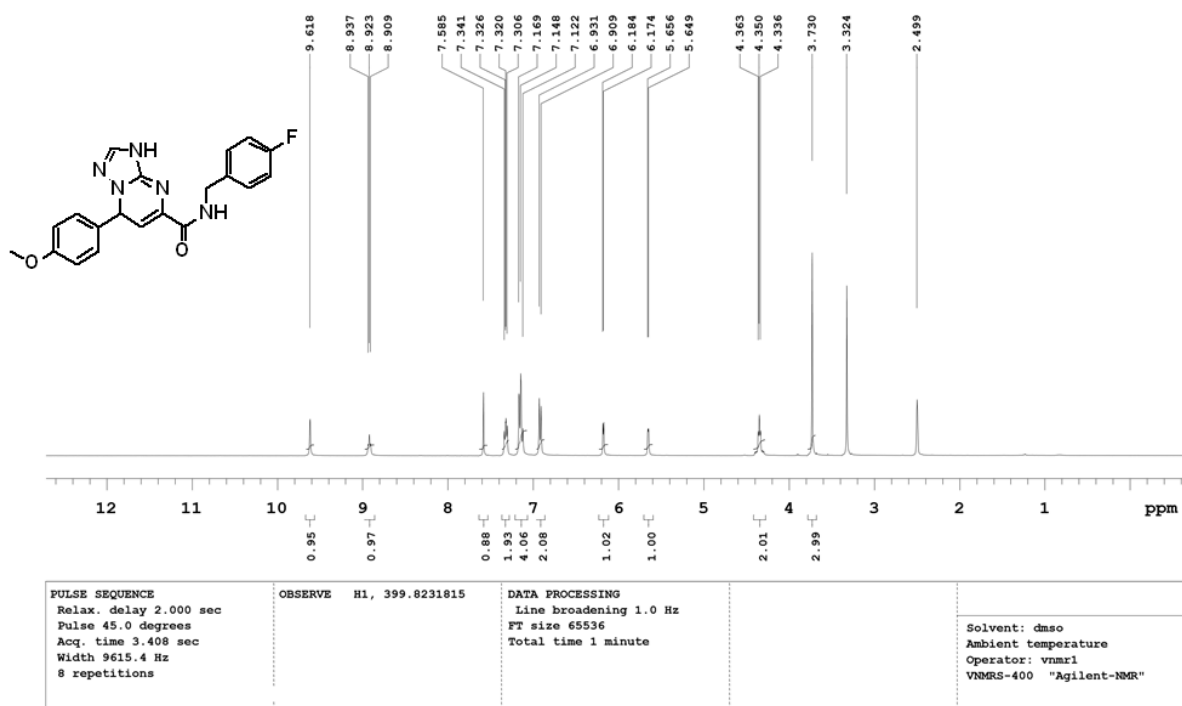

# <sup>13</sup>C NMR of Compound of **6bb**

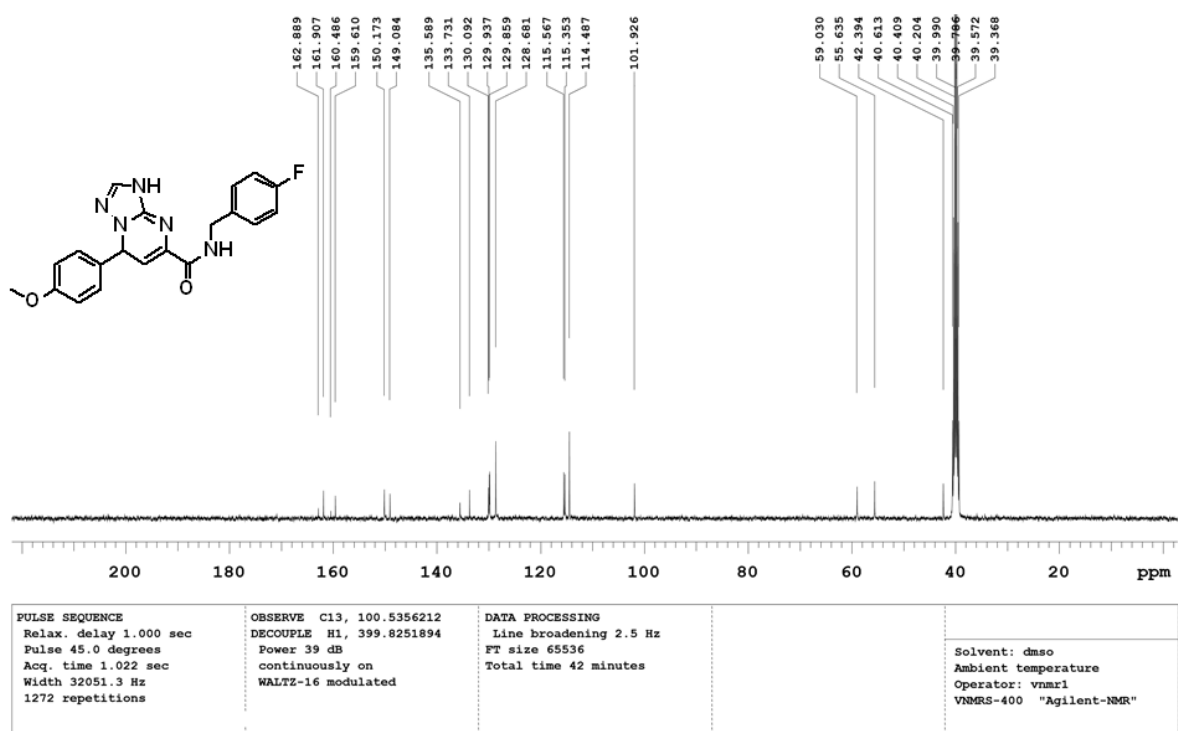

# <sup>1</sup>H NMR of Compound of **6bc**

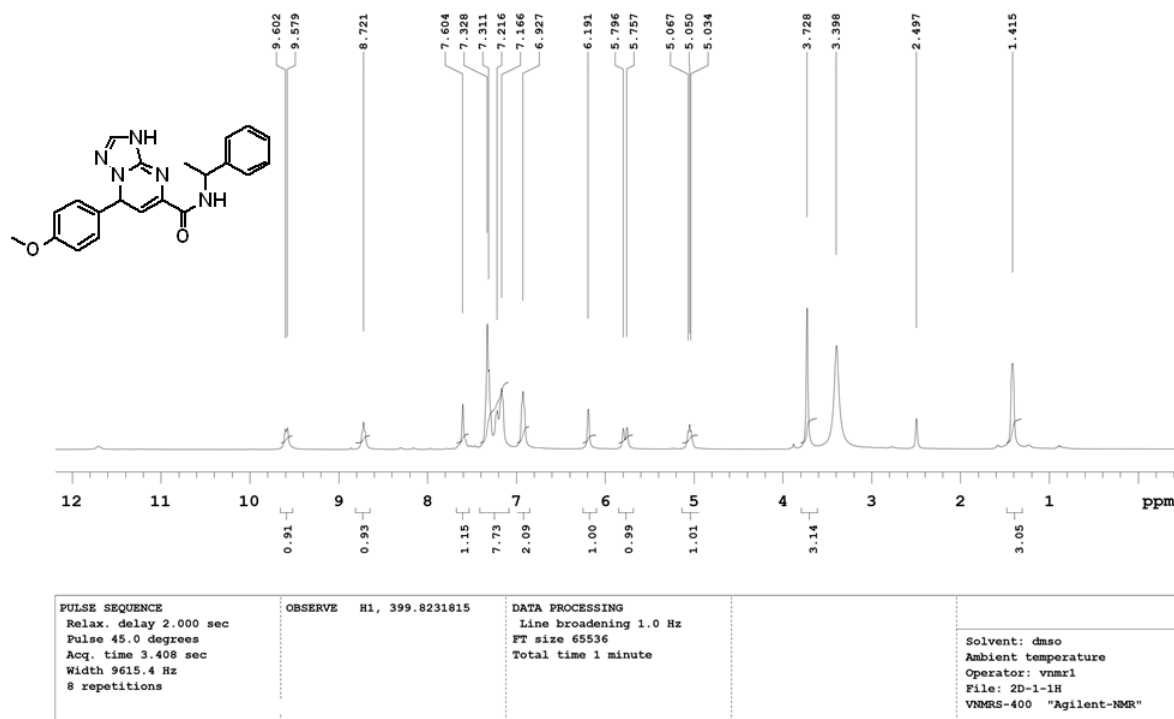

# <sup>13</sup>C NMR of Compound of **6bc**

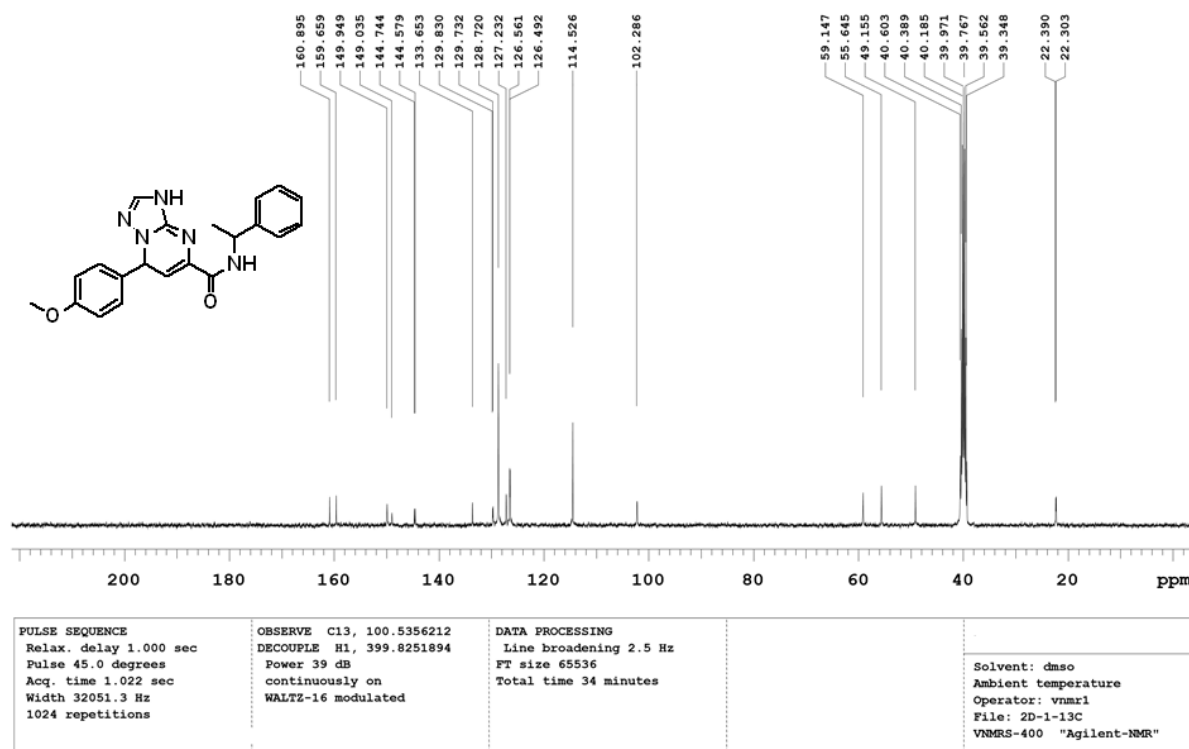

# <sup>1</sup>H NMR of Compound of **6be**

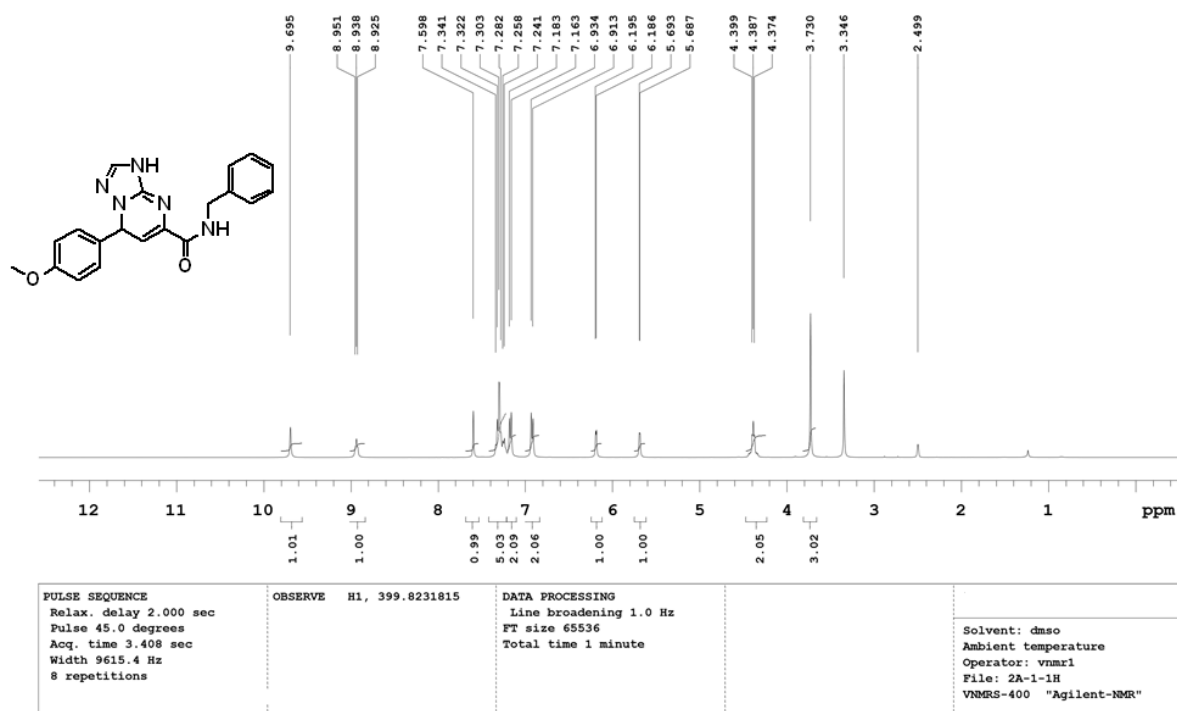

# <sup>13</sup>C NMR of Compound of **6be**

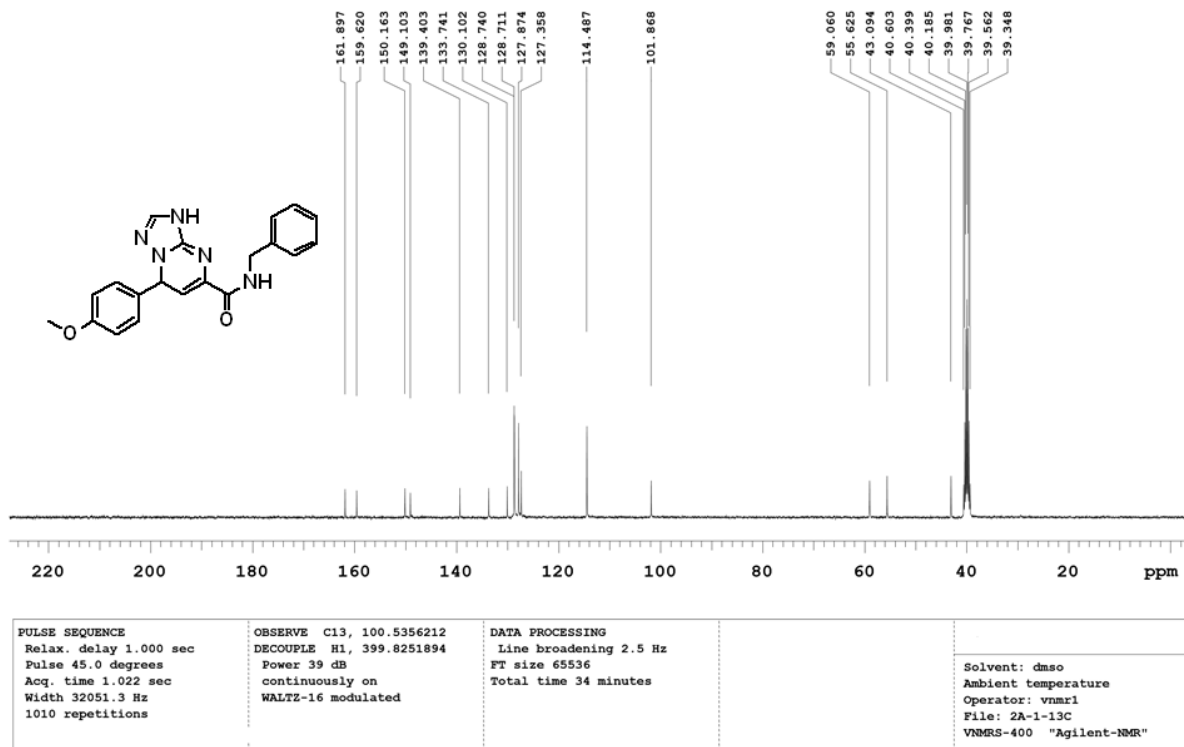

# <sup>1</sup>H NMR of Compound of **6bf**

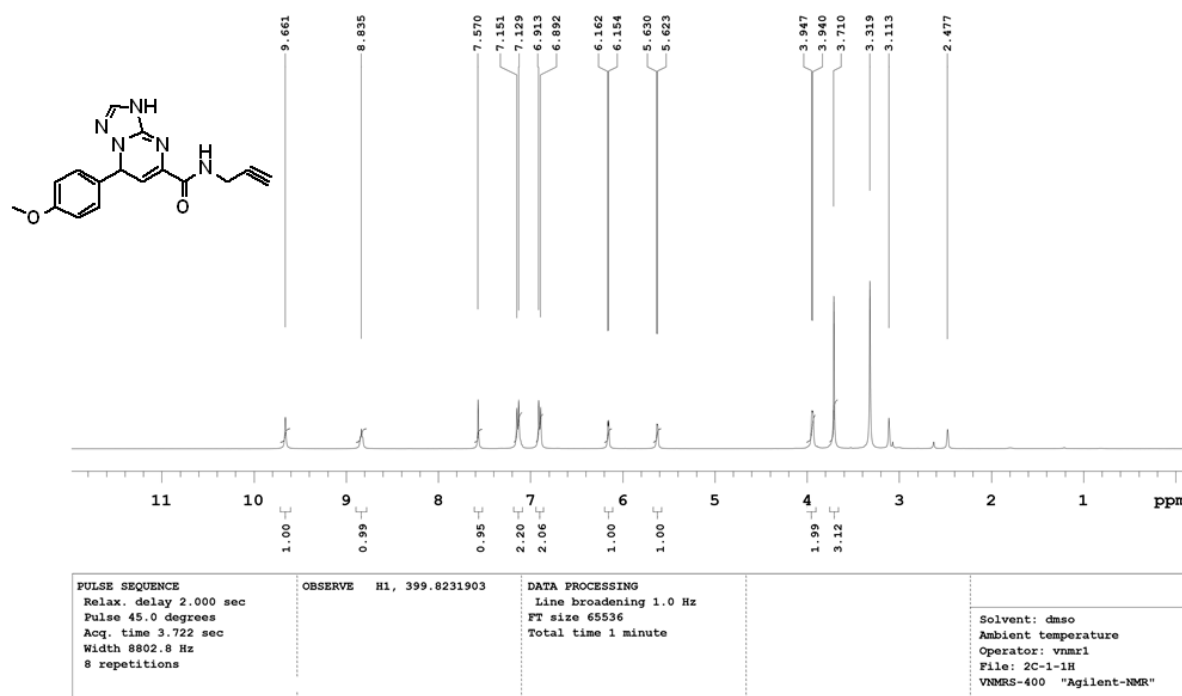

# <sup>1</sup>H NMR of Compound of **6bg**

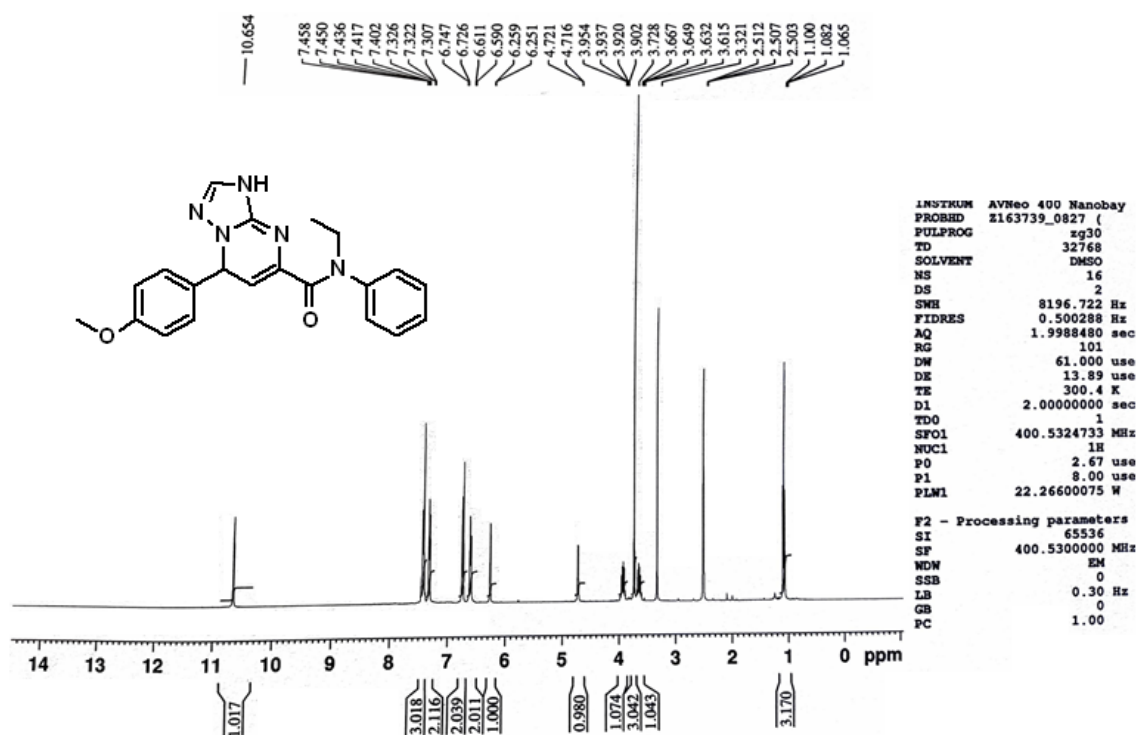

# <sup>13</sup>C NMR of Compound of **6bg**

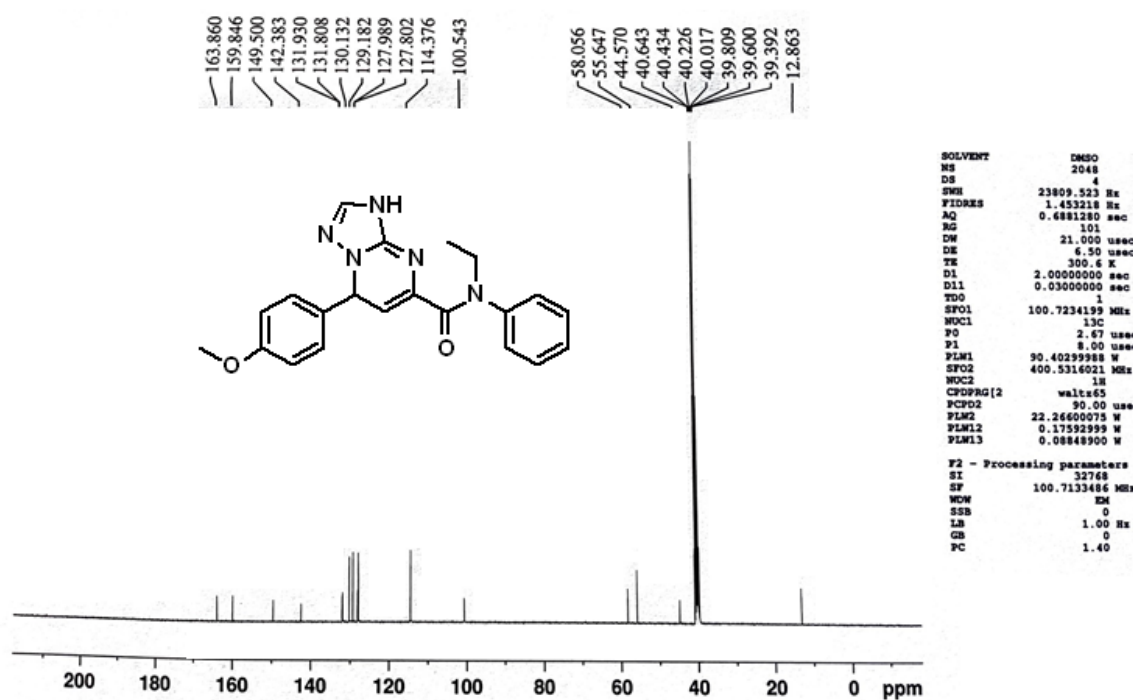

# <sup>1</sup>H NMR of Compound of **6bh**

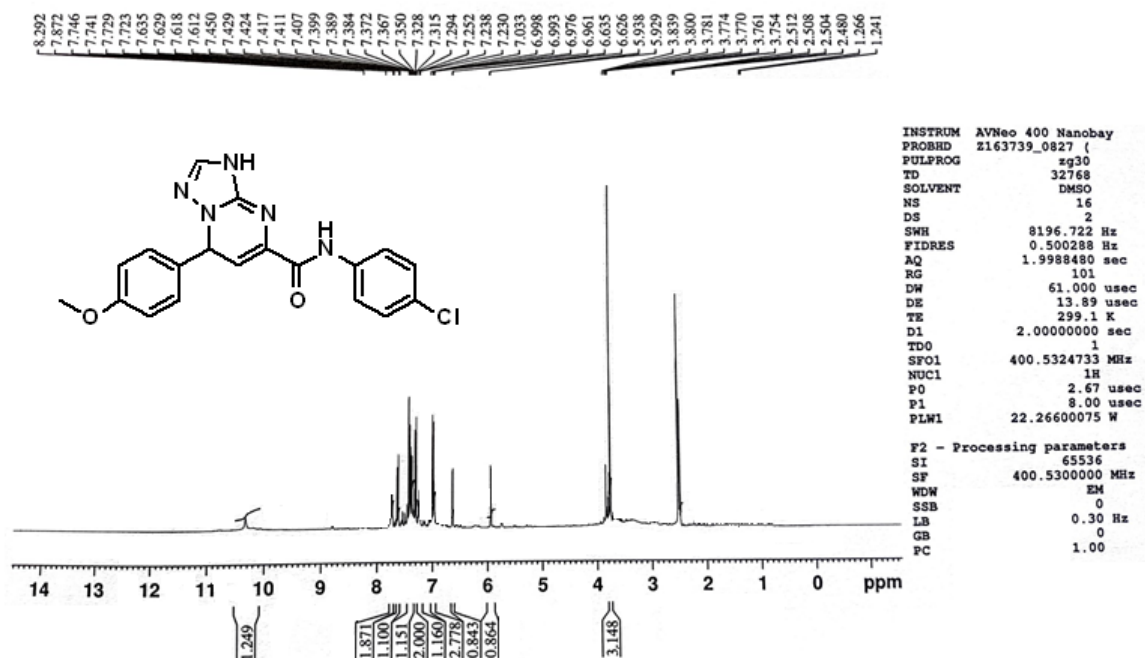

# <sup>13</sup>C NMR of Compound of **6bh**

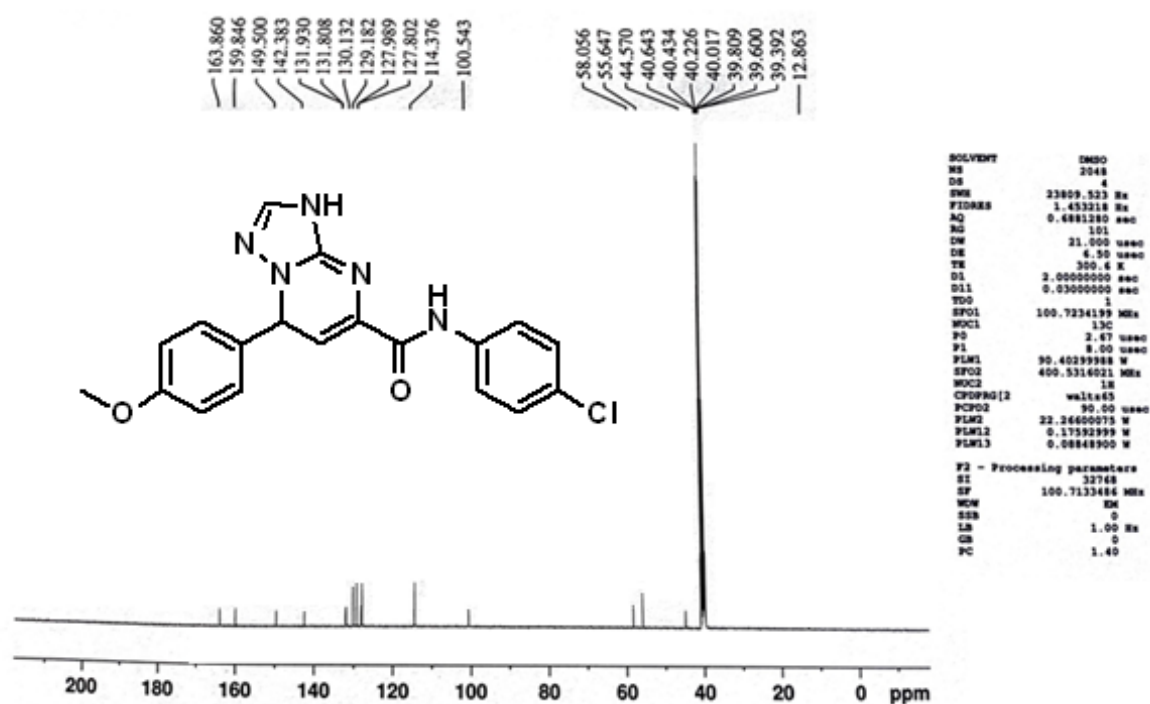

# <sup>1</sup>H NMR of Compound of **6bi**

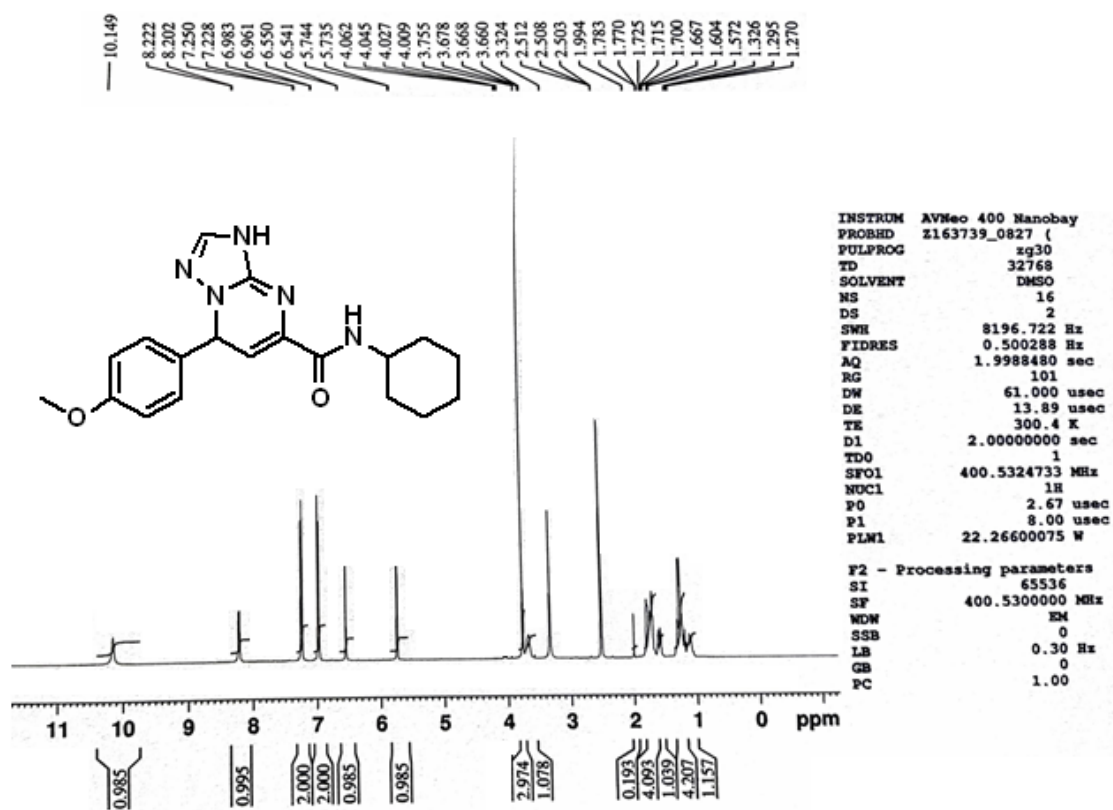



# <sup>13</sup>C NMR of Compound of **6bi**

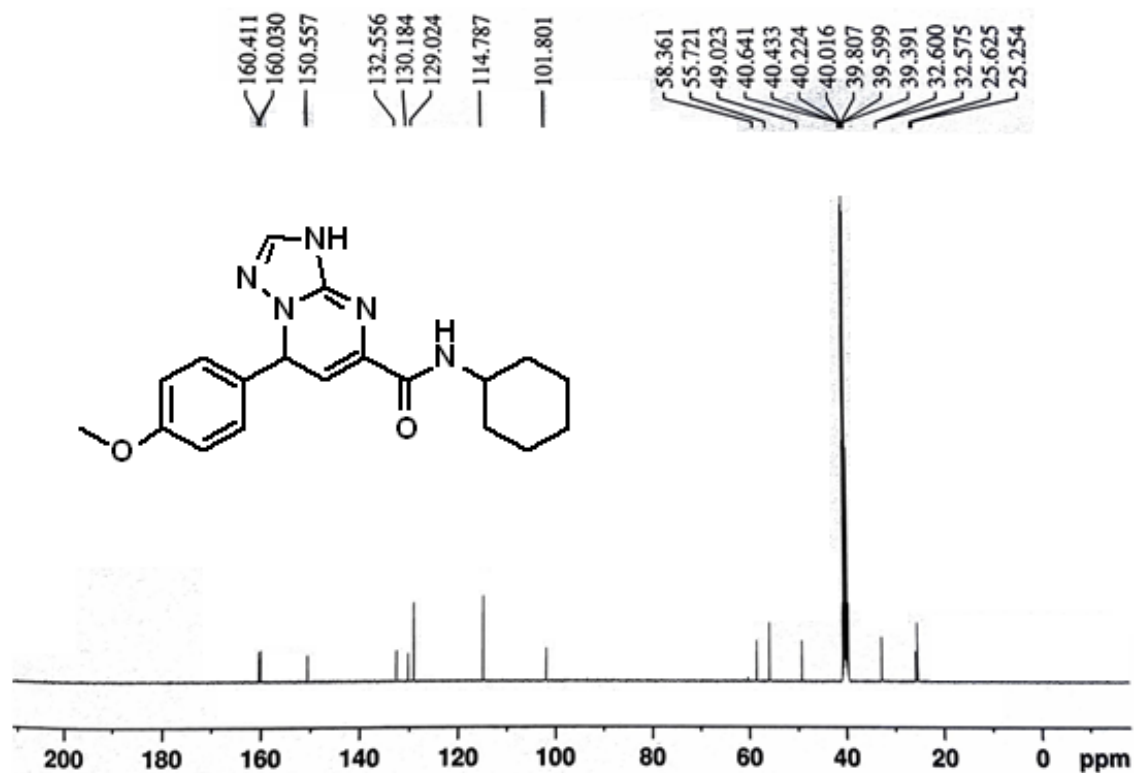

# <sup>1</sup>H NMR of Compound of **4c**

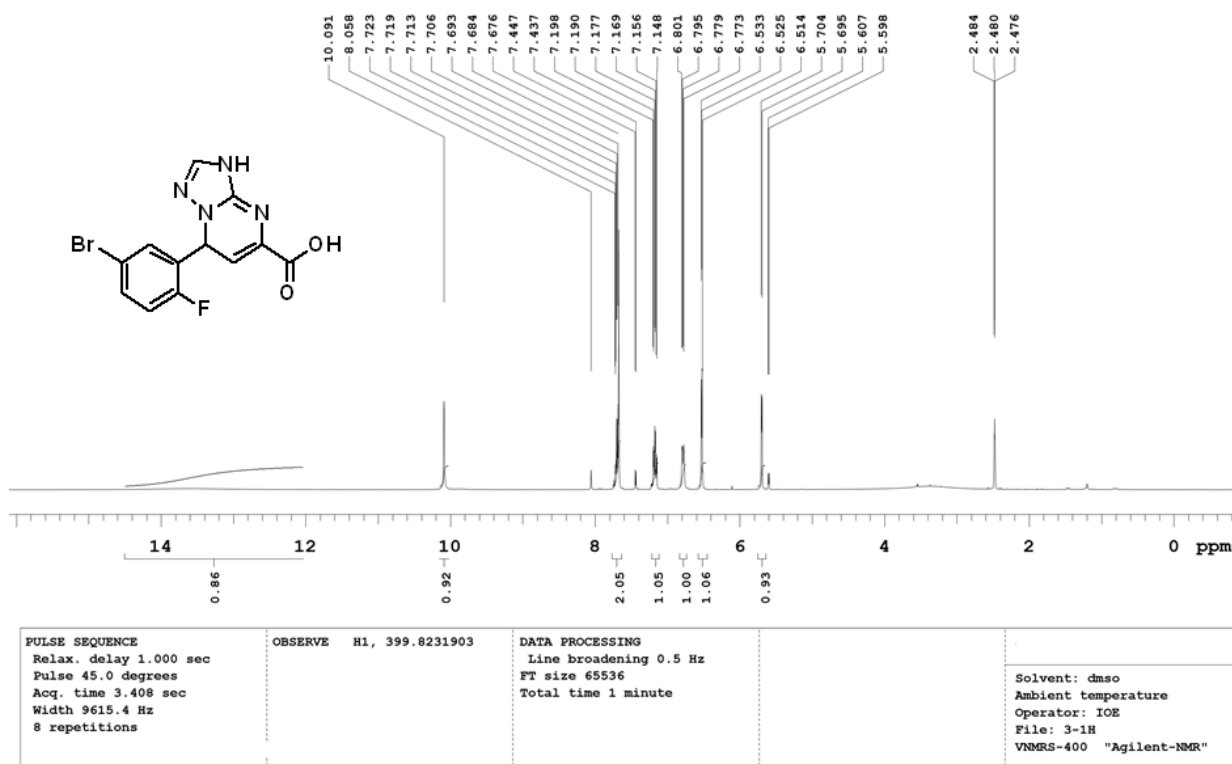

# <sup>13</sup>C NMR of Compound of **4c**

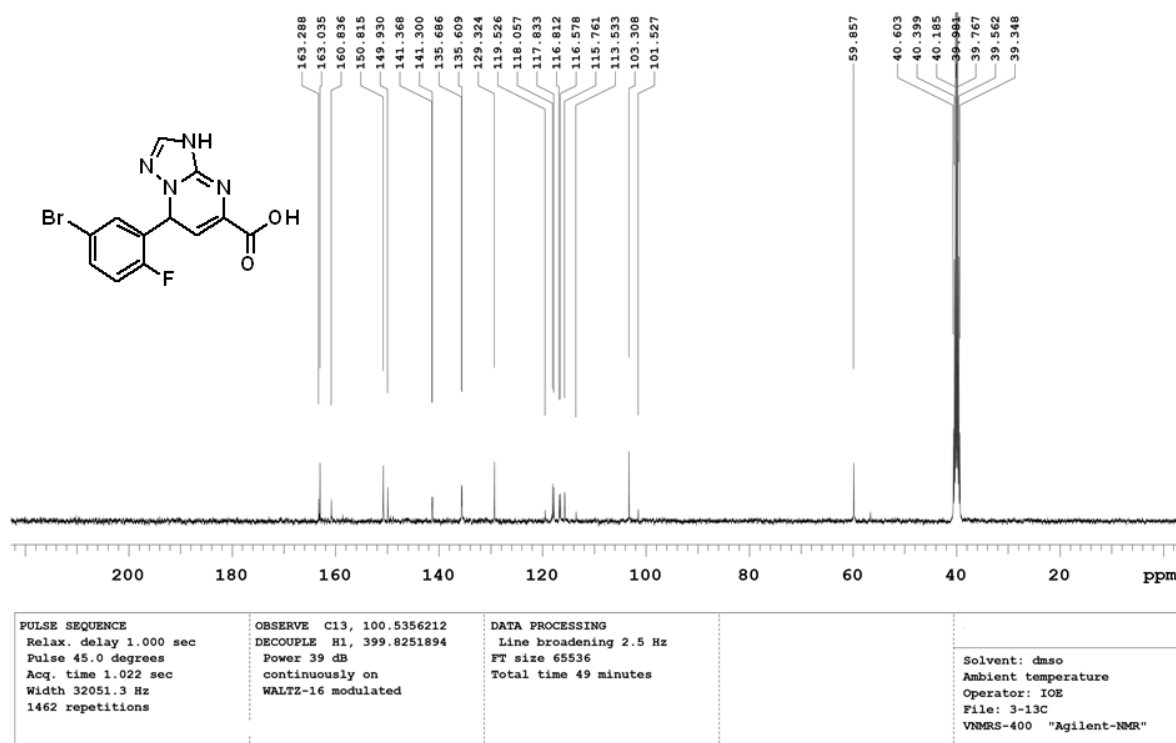

# <sup>1</sup>H NMR of Compound of **6cb**

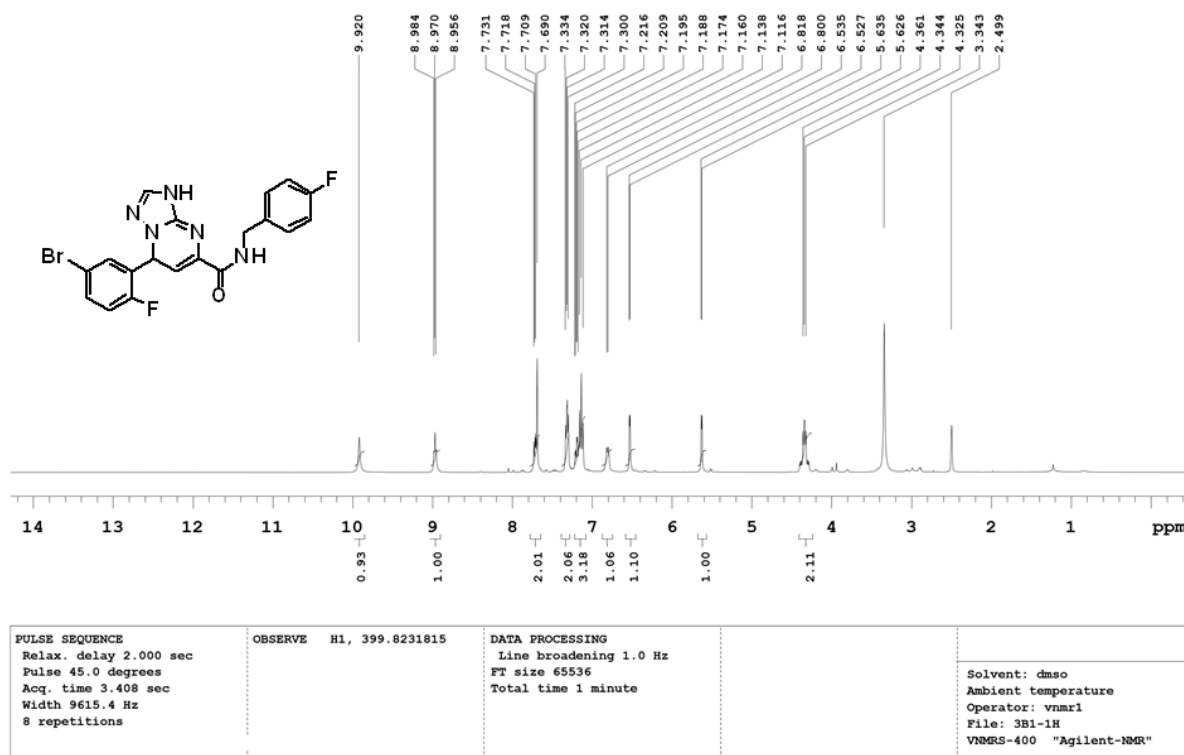

## <sup>13</sup>C NMR of Compound of **6cb**

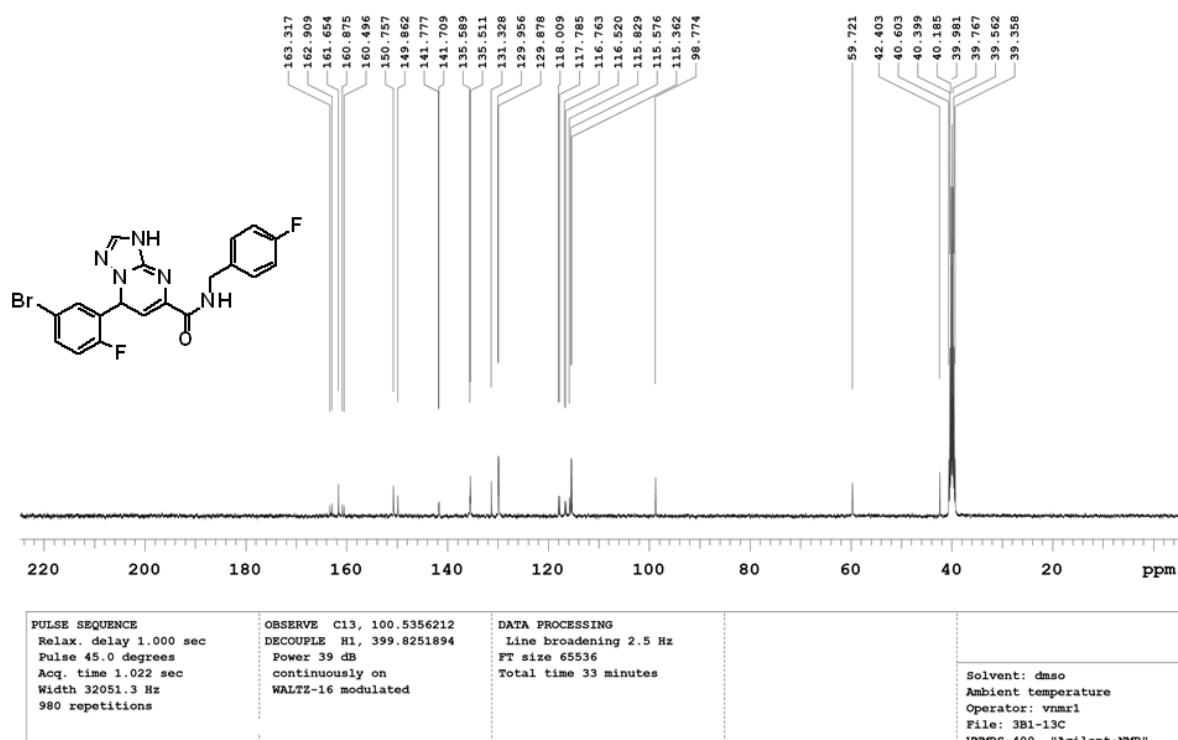

## <sup>1</sup>H NMR of Compound of **6cc**

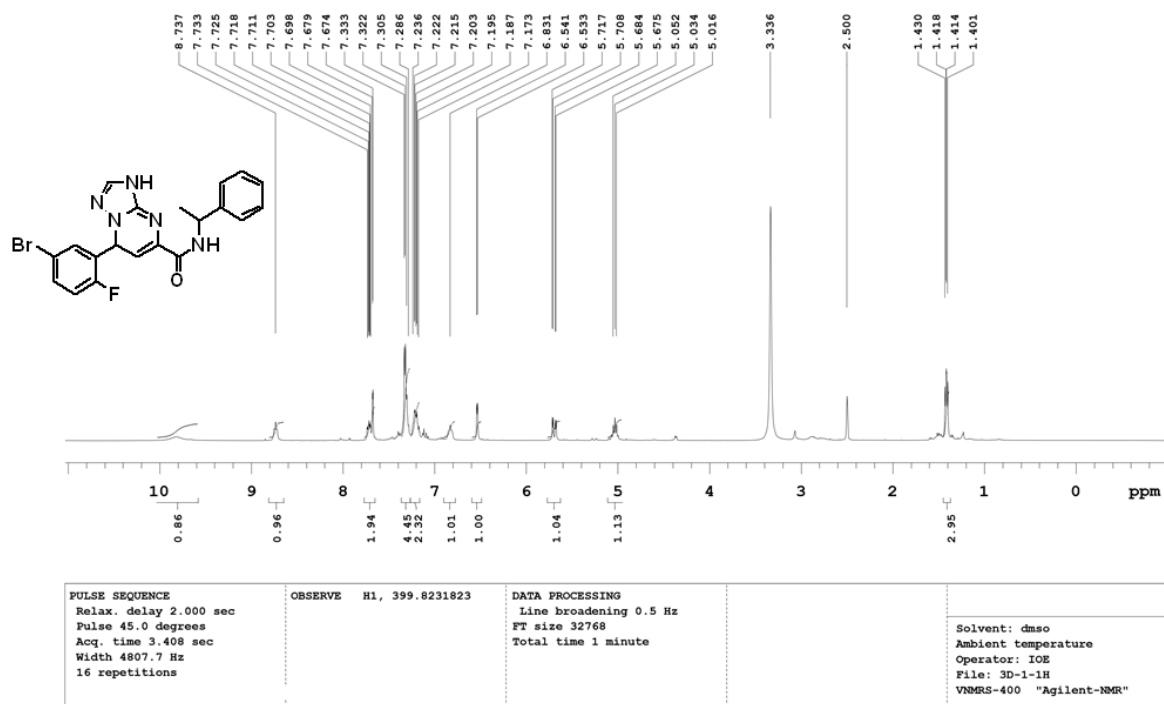

# <sup>13</sup>C NMR of Compound of **6cc**

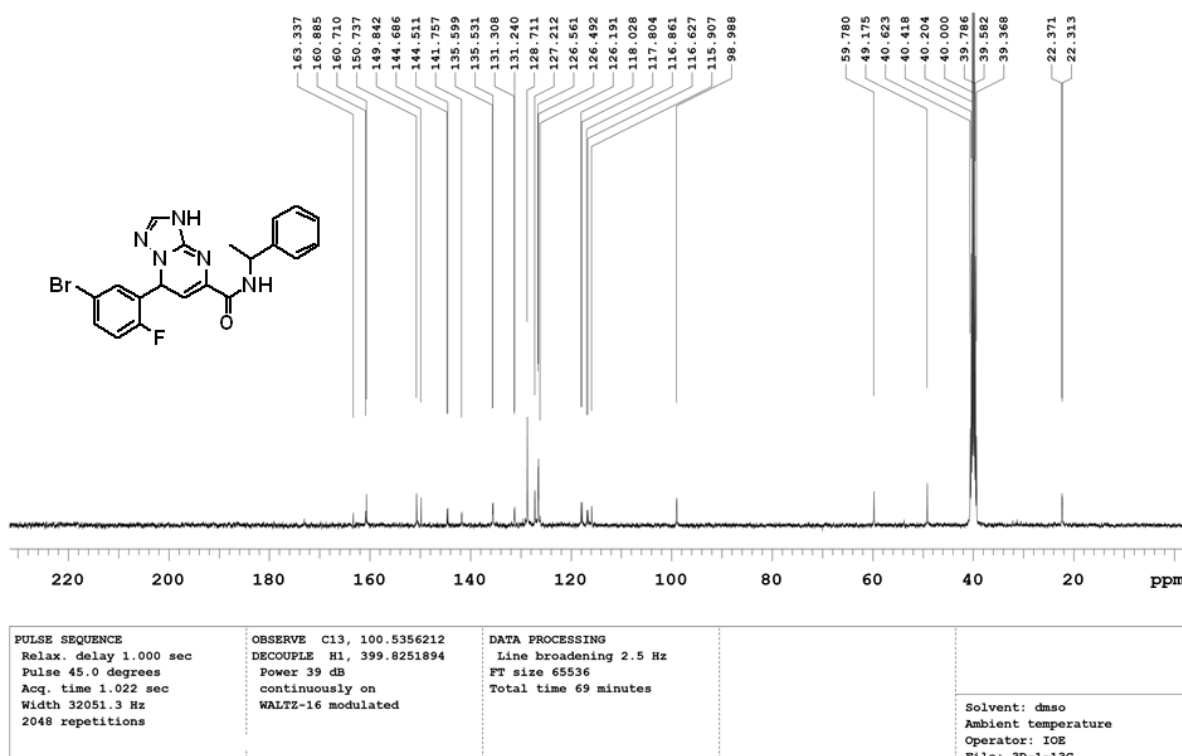

# <sup>1</sup>H NMR of Compound of **6ce**

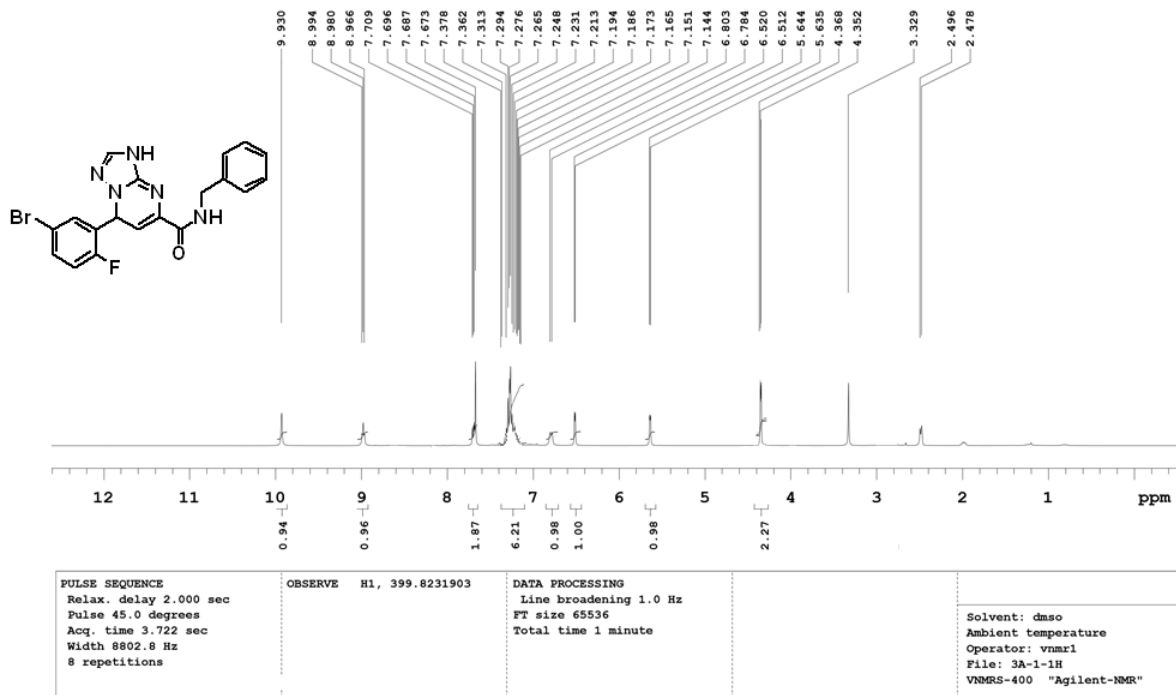

# <sup>13</sup>C NMR of Compound of **6ce**

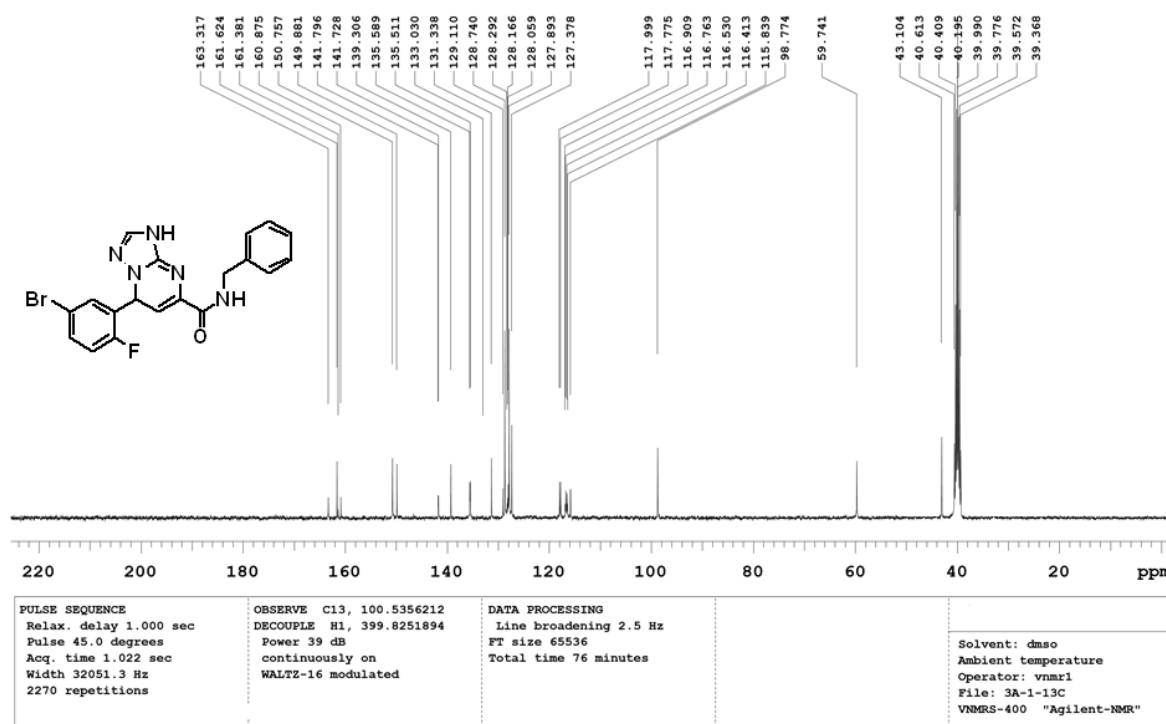

# <sup>1</sup>H NMR of Compound of **6cf**

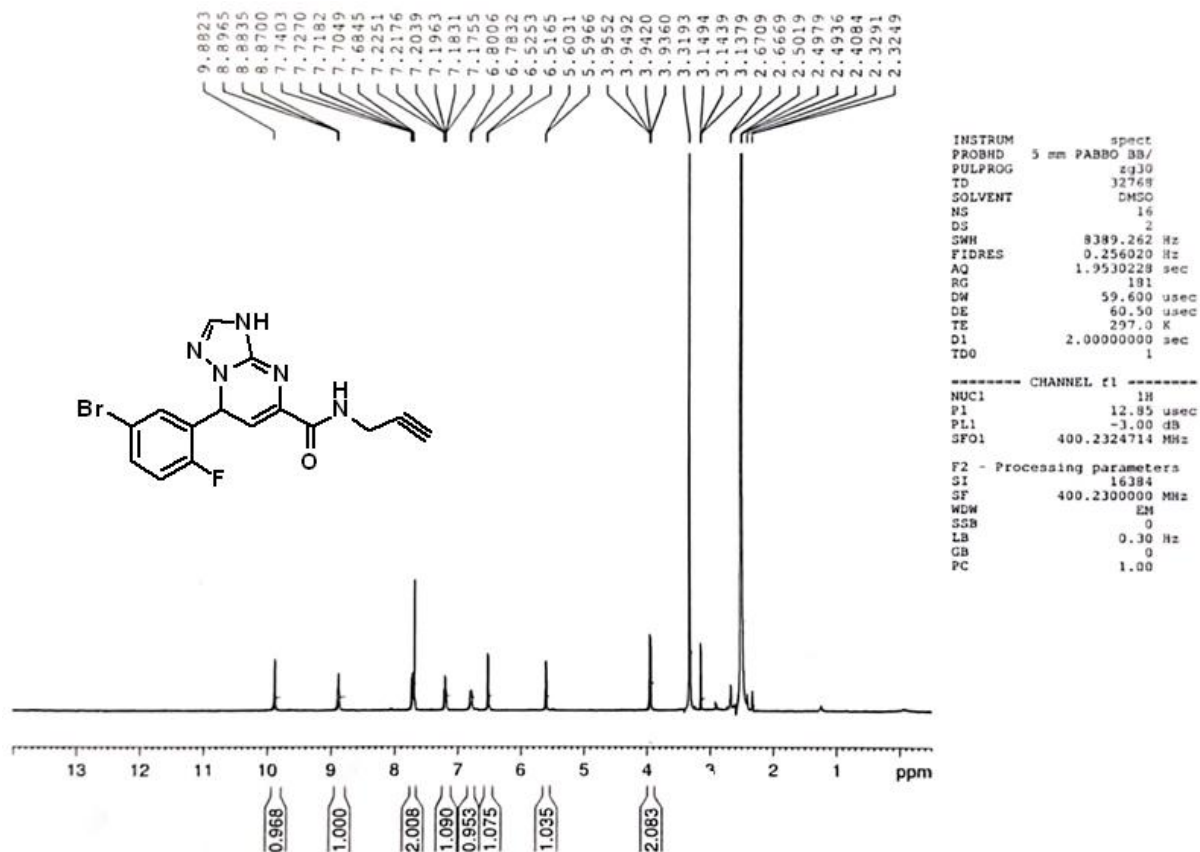

# <sup>1</sup>H NMR of Compound of **6cg**

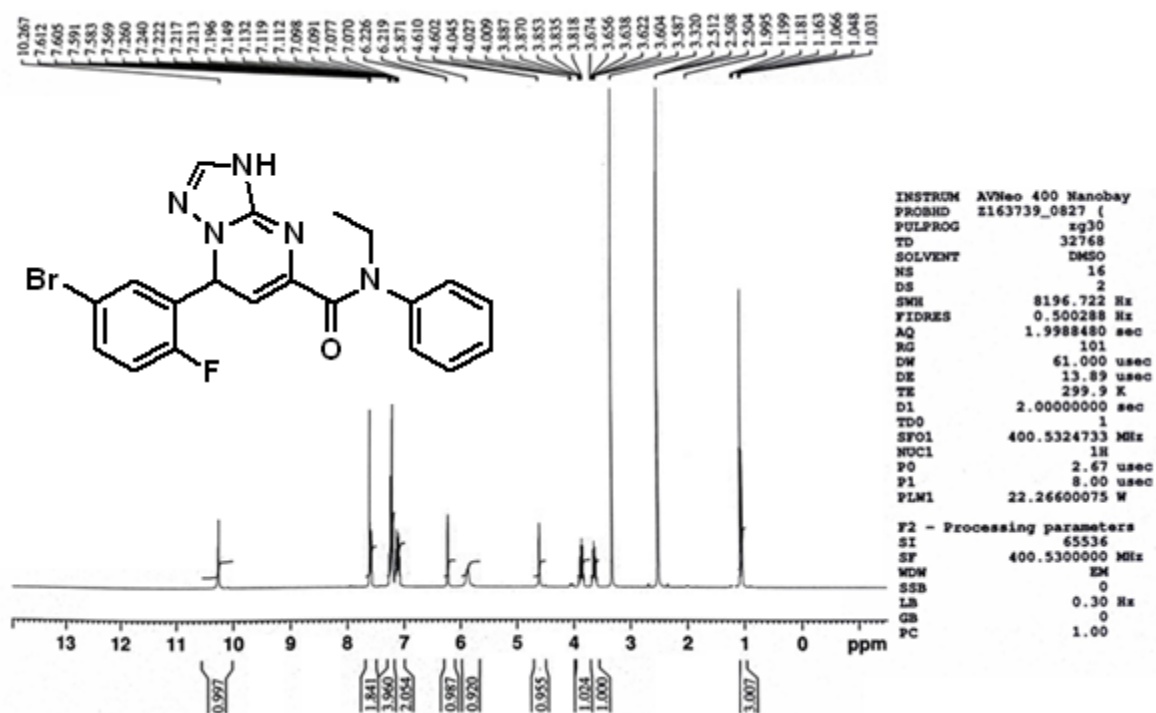

# <sup>13</sup>C NMR of Compound of **6cg**

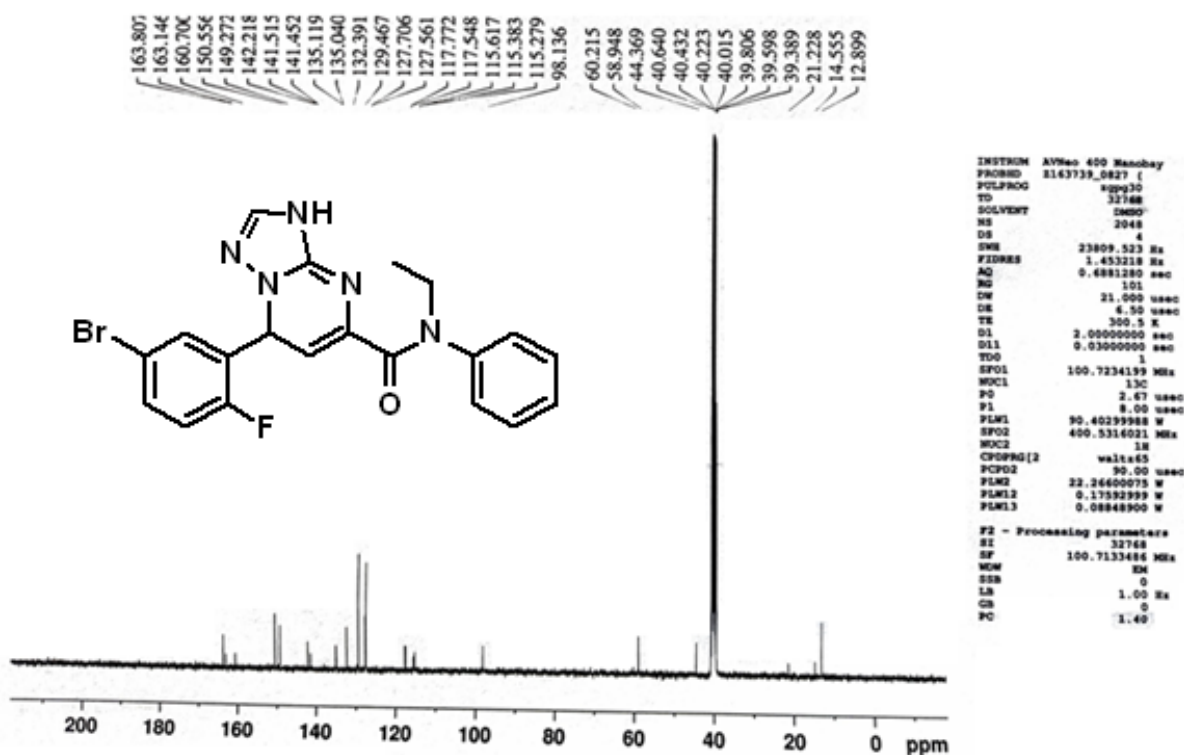

# <sup>1</sup>H NMR of Compound of **6ch**

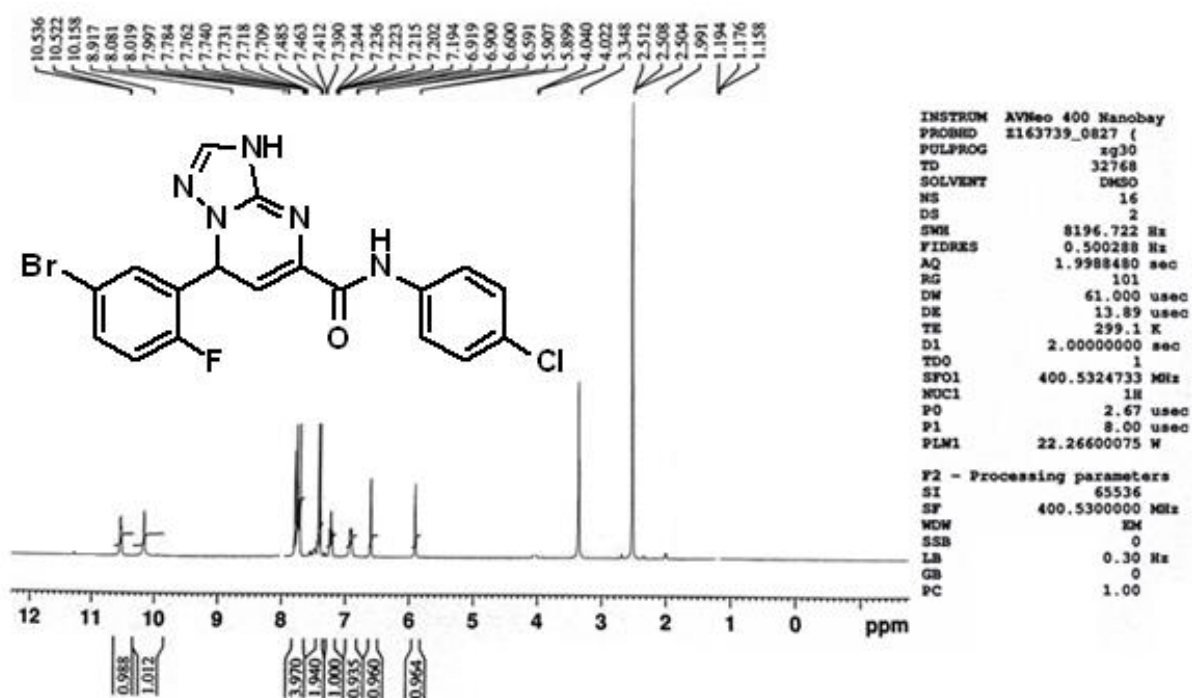

# <sup>13</sup>C NMR of Compound of **6ch**

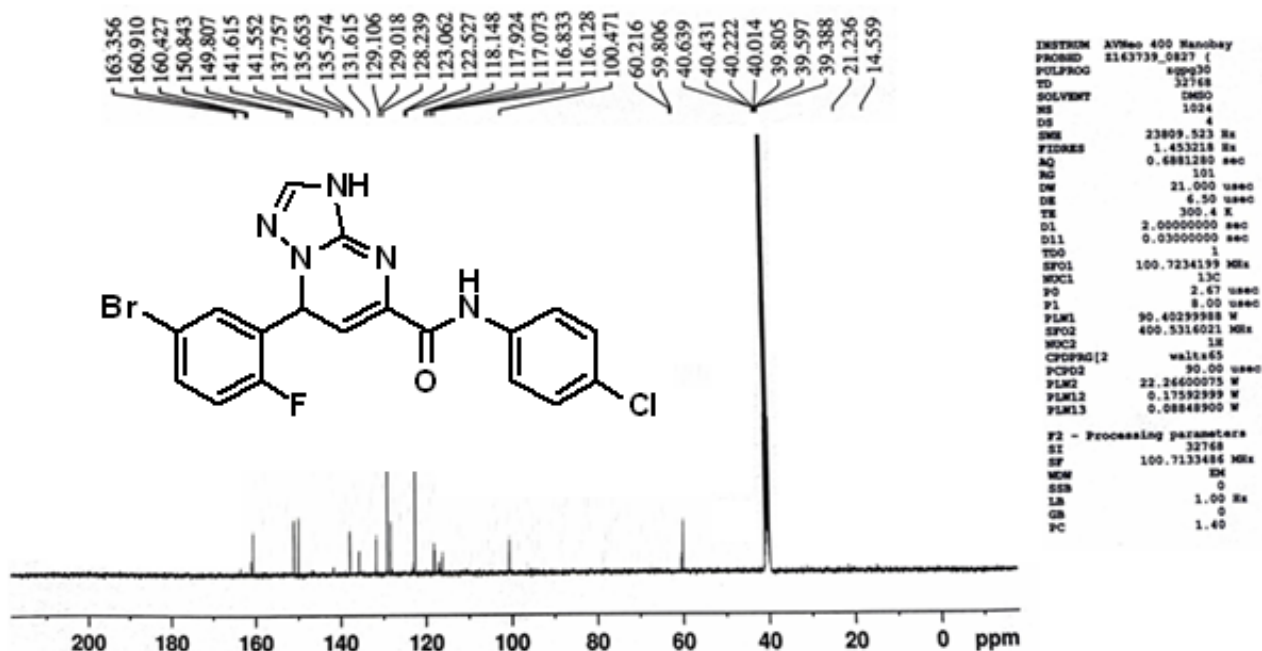

### <sup>1</sup>H NMR of Compound of **6ci**

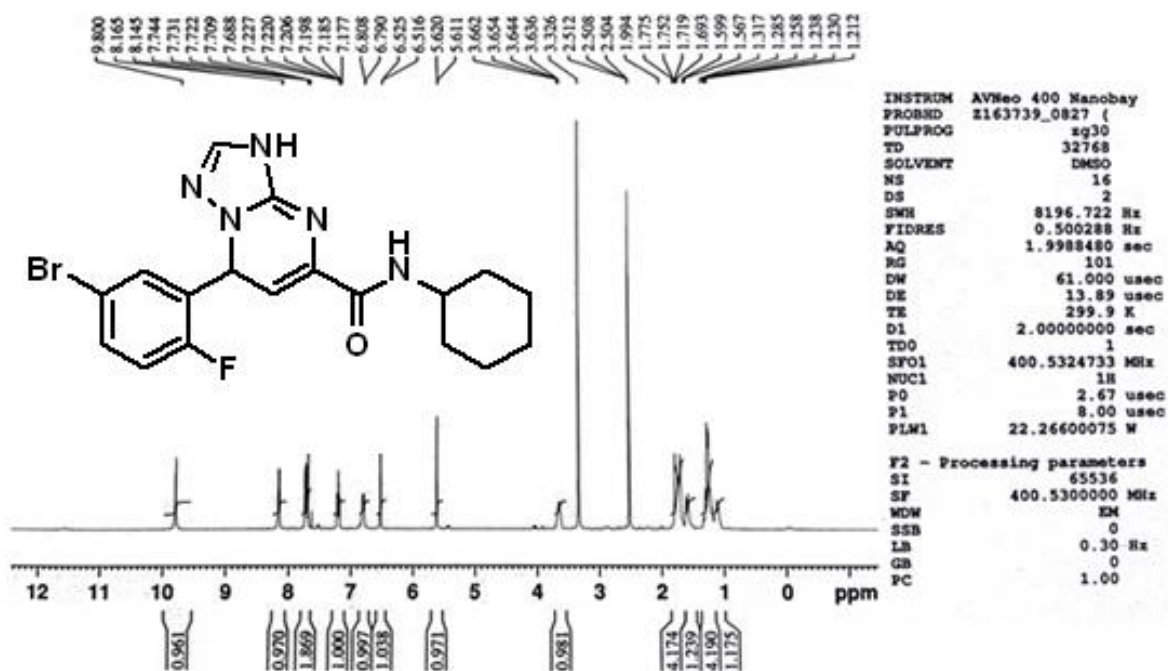 $^{13}\text{C}$  NMR of Compound of **6ci**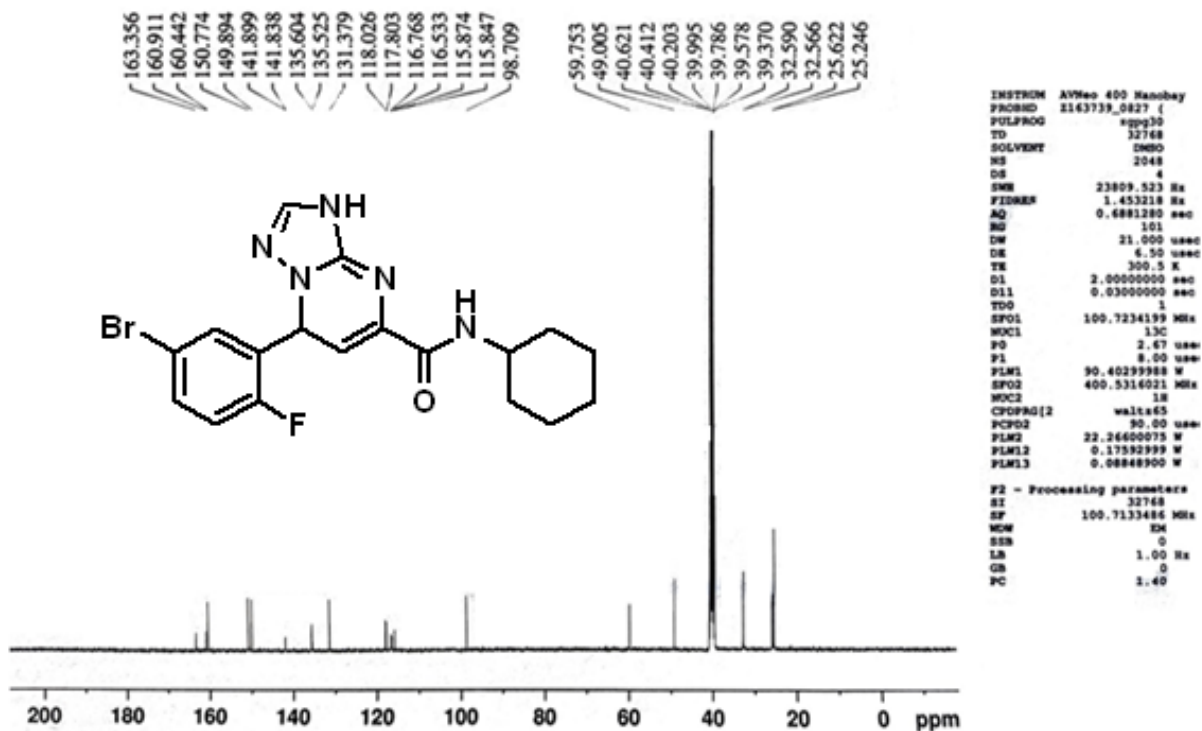

Supplement: s1 [file s1]
